# Supplementary material for: System Approaches to Water, Sanitation, and Hygiene: A Systematic Literature Review
Source: Int J Environ Res Public Health. 2020 Jan 21;17(3):702. doi: 10.3390/ijerph17030702 (PMC7037755; doi:10.3390/ijerph17030702)
Supplement: Supplementary file 1 [file ijerph-17-00702-s001.pdf]

# ***Systems Approaches to Water, Sanitation and Hygiene: A Systematic Literature Review***

Nicholas Valcourt<sup>1,3,\*</sup>, Amy Javernick-Will<sup>1,3</sup>, Jeffrey Walters<sup>2,3</sup>, Karl Linden<sup>1,3</sup>

<sup>1</sup> Department of Civil, Environmental, and Architectural Engineering, University of Colorado Boulder, Boulder, CO 80309

<sup>2</sup> College of Engineering, George Fox University, Newberg, OR 97132

<sup>3</sup> USAID Sustainable WASH Systems Learning Partnership

\* Correspondence: Nicholas.Valcourt@Colorado.edu;

Received: date; Accepted: date; Published: date

**Abstract:** Endemic issues of sustainability in the Water, Sanitation and Hygiene (WASH) sector have led to the rapid expansion of ‘system approaches’ to for assessing the multitude of interconnected factors that affect WASH outcomes. However, the sector lacks a systematic analysis and characterization of the knowledge base for systems approaches, in particular how and where they are being implemented and what outcomes have resulted from their application. To address this need, we conducted a wide-ranging systematic literature review of systems approaches for WASH across the peer-reviewed, grey, and organizational literature. Our results show a myriad of methods, scope, and applications within the sector, but an inadequate level of information in the literature to evaluate the utility and efficacy of systems approaches for improving WASH service sustainability. Based on this analysis, we propose four recommendations for improving the evidence base including; diversifying methods that explicitly evaluate interconnections between factors within WASH systems, expanding geopolitical applications, improving reporting on resources required to implement given approaches, and enhancing documentation of effects of system approaches on WASH services. Overall, these findings provide a robust survey of the existing landscape of systems approaches for WASH and propose a path for future research in this emerging field.

**Keywords:** WASH; systems approaches; systematic literature review; grey literature

---

**Supplementary Information**

## SI 1: PRISMA CHECKLIST

Table S1-1: Preferred Reporting Items for Systematic Reviews and Meta-Analyses (PRISMA) Checklist

| SECTION/TOPIC                             | #  | CHECKLIST ITEM                                                                                                                                                                                                                                                                                              | REPORTED ON PAGE #                 |
|-------------------------------------------|----|-------------------------------------------------------------------------------------------------------------------------------------------------------------------------------------------------------------------------------------------------------------------------------------------------------------|------------------------------------|
| <b>TITLE</b>                              |    |                                                                                                                                                                                                                                                                                                             |                                    |
| <b>Title</b>                              | 1  | Identify the report as a systematic review, meta-analysis, or both.                                                                                                                                                                                                                                         | Title                              |
| <b>ABSTRACT</b>                           |    |                                                                                                                                                                                                                                                                                                             |                                    |
| <b>Structured summary</b>                 | 2  | Provide a structured summary including, as applicable: background; objectives; data sources; study eligibility criteria, participants, and interventions; study appraisal and synthesis methods; results; limitations; conclusions and implications of key findings; systematic review registration number. | Abstract                           |
| <b>INTRODUCTION</b>                       |    |                                                                                                                                                                                                                                                                                                             |                                    |
| <b>Rationale</b>                          | 3  | Describe the rationale for the review in the context of what is already known.                                                                                                                                                                                                                              | Introduction                       |
| <b>Objectives</b>                         | 4  | Provide an explicit statement of questions being addressed with reference to participants, interventions, comparisons, outcomes, and study design (PICOS).                                                                                                                                                  | 1.1 Study objectives               |
| <b>METHODS</b>                            |    |                                                                                                                                                                                                                                                                                                             |                                    |
| <b>Protocol and registration</b>          | 5  | Indicate if a review protocol exists, if and where it can be accessed (e.g., Web address), and, if available, provide registration information including registration number.                                                                                                                               | 2. Methods                         |
| <b>Eligibility criteria</b>               | 6  | Specify study characteristics (e.g., PICOS, length of follow-up) and report characteristics (e.g., years considered, language, publication status) used as criteria for eligibility, giving rationale.                                                                                                      | 2.1 Literature ID                  |
| <b>Information sources</b>                | 7  | Describe all information sources (e.g., databases with dates of coverage, contact with study authors to identify additional studies) in the search and date last searched.                                                                                                                                  | 2.1 Literature ID                  |
| <b>Search</b>                             | 8  | Present full electronic search strategy for at least one database, including any limits used, such that it could be repeated.                                                                                                                                                                               | 2.1 Table 1, search string formula |
| <b>Study selection</b>                    | 9  | State the process for selecting studies (i.e., screening, eligibility, included in systematic review, and, if applicable, included in the meta-analysis).                                                                                                                                                   | 2.2 Selection of articles          |
| <b>Data collection process</b>            | 10 | Describe method of data extraction from reports (e.g., piloted forms, independently, in duplicate) and any processes for obtaining and confirming data from investigators.                                                                                                                                  | 2.2 Data extraction                |
| <b>Data items</b>                         | 11 | List and define all variables for which data were sought (e.g., PICOS, funding sources) and any assumptions and simplifications made.                                                                                                                                                                       | 2.2.1; 2.2.2<br>Screening criteria |
| <b>Risk of bias in individual studies</b> | 12 | Describe methods used for assessing risk of bias of individual studies (including specification of whether this was done at the study or outcome level), and how this information is to be used in any data synthesis.                                                                                      | 2.2.2.3<br>Application             |

|                                      |    |                                                                                                                                                                                                          |                           |
|--------------------------------------|----|----------------------------------------------------------------------------------------------------------------------------------------------------------------------------------------------------------|---------------------------|
| <b>Summary measures</b>              | 13 | State the principal summary measures (e.g., risk ratio, difference in means).                                                                                                                            | N/A                       |
| <b>Synthesis of results</b>          | 14 | Describe the methods of handling data and combining results of studies, if done, including measures of consistency (e.g., $I^2$ ) for each meta-analysis.                                                | N/A                       |
| <b>Risk of bias across studies</b>   | 15 | Specify any assessment of risk of bias that may affect the cumulative evidence (e.g., publication bias, selective reporting within studies).                                                             | Conclusions / Limitations |
| <b>Additional analyses</b>           | 16 | Describe methods of additional analyses (e.g., sensitivity or subgroup analyses, meta-regression), if done, indicating which were pre-specified.                                                         | N/A                       |
| <b>RESULTS</b>                       |    |                                                                                                                                                                                                          |                           |
| <b>Study selection</b>               | 17 | Give numbers of studies screened, assessed for eligibility, and included in the review, with reasons for exclusions at each stage, ideally with a flow diagram.                                          | 3.1 Search Results        |
| <b>Study characteristics</b>         | 18 | For each study, present characteristics for which data were extracted (e.g., study size, PICOS, follow-up period) and provide the citations.                                                             | SI Table                  |
| <b>Risk of bias within studies</b>   | 19 | Present data on risk of bias of each study and, if available, any outcome level assessment (see item 12).                                                                                                | N/A                       |
| <b>Results of individual studies</b> | 20 | For all outcomes considered (benefits or harms), present, for each study: (a) simple summary data for each intervention group (b) effect estimates and confidence intervals, ideally with a forest plot. | N/A                       |
| <b>Synthesis of results</b>          | 21 | Present results of each meta-analysis done, including confidence intervals and measures of consistency.                                                                                                  | N/A                       |
| <b>Risk of bias across studies</b>   | 22 | Present results of any assessment of risk of bias across studies (see Item 15).                                                                                                                          | N/A                       |
| <b>Additional analysis</b>           | 23 | Give results of additional analyses, if done (e.g., sensitivity or subgroup analyses, meta-regression [see Item 16]).                                                                                    | N/A                       |
| <b>DISCUSSION</b>                    |    |                                                                                                                                                                                                          |                           |
| <b>Summary of evidence</b>           | 24 | Summarize the main findings including the strength of evidence for each main outcome; consider their relevance to key groups (e.g., healthcare providers, users, and policy makers).                     | 4. Discussion             |
| <b>Limitations</b>                   | 25 | Discuss limitations at study and outcome level (e.g., risk of bias), and at review-level (e.g., incomplete retrieval of identified research, reporting bias).                                            | 4.4 Limitations           |
| <b>Conclusions</b>                   | 26 | Provide a general interpretation of the results in the context of other evidence, and implications for future research.                                                                                  | 5. Conclusions            |
| <b>FUNDING</b>                       |    |                                                                                                                                                                                                          |                           |
| <b>Funding</b>                       | 27 | Describe sources of funding for the systematic review and other support (e.g., supply of data); role of funders for the systematic review.                                                               | Funding Statement         |

From: Moher D, Liberati A, Tetzlaff J, Altman DG, The PRISMA Group (2009). Preferred Reporting Items for Systematic Reviews and Meta-Analyses: The PRISMA Statement. PLoS Med 6(7): e1000097. doi:10.1371/journal.pmed1000097 . For more information, visit: [www.prisma-statement.org](http://www.prisma-statement.org).

## SI 2: SEARCH STRATEGY

Table S2-1: Databases Included in Literature Search

| Database Name                                                         | Description                                                                                                      | Rationale                                                                                                                                                                                                         | Database Type        | Literature Types                      | Search Results |
|-----------------------------------------------------------------------|------------------------------------------------------------------------------------------------------------------|-------------------------------------------------------------------------------------------------------------------------------------------------------------------------------------------------------------------|----------------------|---------------------------------------|----------------|
| ASCE Research Library                                                 | Articles from ASCE journals, papers from conference proceedings, and e-books and standards.                      | Preliminary reviews showed that it contained many sources of complex systems analysis for water and wastewater service delivery.                                                                                  | Organization         | Peer-reviewed                         | 821            |
| Carolina Digital Repository                                           | Repository of University of North Carolina publications (student, thesis, etc..).                                | Includes documents from documents from the Gillings School of Global Public Health at UNC and The Water Institute at UNC, conveners of the Water & Health Conference, one of the largest annual WASH conferences. | Academic Institution | Peer-reviewed<br>Grey Thesis          | 13             |
| Deutsche Gesellschaft für Internationale Zusammenarbeit (GIZ) Library | Database of Deutsche Gesellschaft für Internationale Zusammenarbeit GmbH (GIZ), German development agency.       | One of the larger and most innovative bilateral organizations working in the WASH sector worldwide. Also, open source resource.                                                                                   | Organization         | Grey<br>Organizational<br>Open Source | 109            |
| DFID                                                                  | Database of The Department for International Development (DFID), which manages the UK Government's aid programs. | A large funder of WASH projects worldwide and early adopter of systems approaches to development                                                                                                                  | Organization         | Grey<br>Organizational<br>Open Source | 1              |
| EBSCO                                                                 | Provider of 375 full-text databases for e-journals, magazine subscriptions,                                      | One of the largest and most comprehensive databases covering WASH and systems research topics.                                                                                                                    | Provider             | Peer-reviewed                         | 4,129          |

|                                                  |                                                                                                                                                                                 |                                                                                                                                                                                                          |                      |                                |       |
|--------------------------------------------------|---------------------------------------------------------------------------------------------------------------------------------------------------------------------------------|----------------------------------------------------------------------------------------------------------------------------------------------------------------------------------------------------------|----------------------|--------------------------------|-------|
|                                                  | ebooks and discovery service for academic libraries, public libraries.                                                                                                          |                                                                                                                                                                                                          |                      |                                |       |
| ELDIS (Int'l development)                        | Eldis repository of the Institute of Development Studies managed by Knowledge, Impact and Policy team.                                                                          | Database focused specifically on international development topics, including WASH, with a range of peer-reviewed and grey literature that is open source.                                                | Provider             | Grey Peer-reviewed Open Source | 151   |
| International Rescue Committee Library           | Repository of The International Rescue Committee (IRC), a global humanitarian aid, relief, and development nongovernmental organization. Library of IRC WASH - formerly the WHO | IRC is a large donor and implementer in the WASH sector, including in systems approaches to WASH.                                                                                                        | Organization         | Organizational                 | 44    |
| IRC WASH                                         | International Reference Center on Community Water Supply (abbreviated as I.R.C.).                                                                                               | Database consists of publications by IRC WASH and others. One of the largest repositories of WASH systems-focused work.                                                                                  | Organization         | Organizational                 | 1,357 |
| Loughborough University Institutional Repository | Repository of Loughborough University publications (student, thesis, etc..).                                                                                                    | Includes documents from Loughborough's Water, Engineering and Development Centre (WEDC), an innovative WASH research center and convener of a large annual conferences on innovative directions in WASH. | Academic Institution | Peer-reviewed Thesis           | 27    |
| OECD iLibrary                                    | OECD iLibrary is the online library of the Organisation for Economic Cooperation and Development (OECD) featuring its books, papers                                             | OECD is a large funder of innovative research and projects in the infrastructure services sector, including water supply and sanitation.                                                                 | Organization         | Grey Organizational            | 13    |

|                                        |                                                                                                                                                                    |                                                                                                                                                                         |                      |                      |     |
|----------------------------------------|--------------------------------------------------------------------------------------------------------------------------------------------------------------------|-------------------------------------------------------------------------------------------------------------------------------------------------------------------------|----------------------|----------------------|-----|
|                                        | and statistics and is the gateway to OECD's analysis and data.                                                                                                     |                                                                                                                                                                         |                      |                      |     |
| PAIS International                     | International coverage of public affairs, public and social policies, and international relations. It includes two databases, PAIS International and PAIS Archive. | Provider of peer-reviewed-reviewed and grey literature from countries outside of North America and Europe, focused on international topics, including WASH.             | Provider             | Peer-reviewed Grey   | 518 |
| ProQuest Dissertations and Theses      | ProQuest for Dissertations                                                                                                                                         | Used to specifically search for dissertations on WASH systems topics which may have not been disseminated through peer-reviewed reviewed or grey sources.               | Provider             | Thesis               | 376 |
| SciELO                                 | SciELO is a bibliographic database, digital library, and cooperative electronic publishing model of open access journals. Primarily with non-English publications  | Large database representing non-English language publications, including non-WASH topics, which may not appear in other journals or databases.                          | Provider             | Peer-reviewed        | 244 |
| SuSanA                                 | Library, project database and discussion forum for the Sustainable Sanitation Alliance, an informal network of people and organizations                            | Organizational and grey literature specifically focused on emerging sanitation topics, both from the SuSanA and its members.                                            | Organization         | Grey Organizational  | 46  |
| University of South Florida Repository | Repository of USF publications (student, thesis, etc..).                                                                                                           | USF is home to the International Development Engineering Program, a teaching and research center focused on new directions and approaches to international development. | Academic Institution | Peer-reviewed Thesis | 24  |

|                                                                   |                                                                                                                                                                                                                                                                                                                  |                                                                                                                                                                                                                                                                                                                                                       |              |                                         |     |
|-------------------------------------------------------------------|------------------------------------------------------------------------------------------------------------------------------------------------------------------------------------------------------------------------------------------------------------------------------------------------------------------|-------------------------------------------------------------------------------------------------------------------------------------------------------------------------------------------------------------------------------------------------------------------------------------------------------------------------------------------------------|--------------|-----------------------------------------|-----|
| Water and Sanitation Program (WSP) Library                        | A multi-donor partnership, part of the World Bank Group's Water Global Practice focused on water and sanitation. A global, multi-stakeholder membership and partnership organization that works with poor people, organizations, governments and local entrepreneurs to improve sanitation and hygiene at scale. | Leading producer of research and practice in water and sanitation topics. Early adopter of systems discourses in WASH.                                                                                                                                                                                                                                | Organization | Peer-reviewed<br>Grey<br>Organizational | 105 |
| Water Supply & Sanitation Collaborative Council (WSSCC) Resources | Premier multidisciplinary index covering the journal literature of the sciences.                                                                                                                                                                                                                                 | Similar to WSP, a large producer of research and practice documentation for WASH, including innovative approaches to service delivery.                                                                                                                                                                                                                | Organization | Grey                                    | 35  |
| Web of Science                                                    | Collection of World Bank publications since the 1990s.                                                                                                                                                                                                                                                           | Focus on multidisciplinary research on WASH topics to augment engineering- and public health-focused databases included in the literature review<br>World Bank is one of the largest legacy funders of WASH projects worldwide. This database contains all project reports and evaluations on WASH projects from the bank that have been made public. | Provider     | Peer-reviewed                           | 379 |
| World Bank eLibrary                                               |                                                                                                                                                                                                                                                                                                                  |                                                                                                                                                                                                                                                                                                                                                       | Organization | Organizational                          | 670 |

Table S2-2: WASH and Systems Keywords and Search String Formula

| WASH Keywords    | Systems Keywords | Search String                                      |
|------------------|------------------|----------------------------------------------------|
| drinking water   | actors           | "drinking water" OR "hand washing" OR              |
| hand washing     | adapt            | "hygiene" OR "latrine" OR "sanitation" OR "toilet" |
| hygiene          | alliance         | OR "WASH" OR "water access" OR "water              |
| latrine          | approach         | management" OR "water quality" OR "water           |
| sanitation       | coalition        | resource" OR "water service" OR "water source"     |
| toilet           | complex          | OR "water supply" OR "water use" OR                |
| WASH             | connect          |                                                    |
| water access     | dynamics         | AND                                                |
| water management | emergent         |                                                    |
| water quality    | factors          | "actors" OR "adapt" OR "alliance" OR "approach"    |
| water resource   | feedback         | OR "coalition" OR "complex" OR "connect" OR        |
| water service    | holistic         | "dynamics" OR "emergent" OR "factors" OR           |
| water source     | inter            | "feedback" OR "holistic" OR "inter" OR "network"   |
| water supply     | network          | OR "scenario" OR "social" OR "stakeholder" OR      |
| water use        | scenario         | "system" OR adapt* OR complex* OR connect* OR      |
|                  | social           | dynam* OR inter* OR system* OR                     |
|                  | stakeholder      |                                                    |
|                  | system           |                                                    |

Table S2-3: Initial Screening Exclusion Terms and Criteria

| Exclusion Term            | Exclusion Criteria                                                                                                                                                                                                                                                                              |
|---------------------------|-------------------------------------------------------------------------------------------------------------------------------------------------------------------------------------------------------------------------------------------------------------------------------------------------|
| Non-WASH                  | Study is not applicable to any aspect of the Water, Sanitation & Hygiene Sector.                                                                                                                                                                                                                |
| Water Treatment           | Study of water treatment or water quality including processes, technologies, or microbiology (e.g. evaluation of a ceramic filter design for use in rural communities).                                                                                                                         |
| Wastewater Treatment      | Study of wastewater treatment or water quality including processes, technologies, or microbiology (e.g. evaluation of an eco-san toilet design).                                                                                                                                                |
| Hydrology                 | Study of physical hydrology of water resources including drinking water, wastewater and non-consumption water.                                                                                                                                                                                  |
| Water Resource Management | Study related to the management of water, land and other natural resources for non-consumptive use including irrigation, stream by flows or hydropower.                                                                                                                                         |
| Public Health (WASH)      | Study focused on public health impacts of a WASH program / intervention but does not investigate multiple factors or attributes of that impact.                                                                                                                                                 |
| Meta-Analysis             | Study represented reviews or a meta-analysis of existing literature on a WASH topic. Full text documents for references labeled as meta-analysis were obtained and searched for additional studies which may meet eligibility criteria.                                                         |
| Non-Systems               | Study is related to an aspect of WASH but does not describe an analysis or process that investigates two or more aspects, factors or attributes of the WASH context. (i.e. post-project report evaluating the effectiveness of a sanitation intervention program, cost-effectiveness analysis). |
| Descriptive Statistics    | A study which analyzes the correlations between multiple variables against a chosen WASH outcome, but which is decidedly not 'systematic' in nature                                                                                                                                             |

### SI 3: WORKSHEET AND CODING FORM

Table S3-1: Coding Form

| Attribute   | Descriptors                              | Evaluation Criteria                                                                                                                                                                                                                                                                                                                                                                                                                                                                                                                                                                                                                                                                                                                            |
|-------------|------------------------------------------|------------------------------------------------------------------------------------------------------------------------------------------------------------------------------------------------------------------------------------------------------------------------------------------------------------------------------------------------------------------------------------------------------------------------------------------------------------------------------------------------------------------------------------------------------------------------------------------------------------------------------------------------------------------------------------------------------------------------------------------------|
| Methodology | <b>Method<sup>2</sup></b>                | Stated name of method of analysis or approach employed by the study (open response) and open-coding of methodologies                                                                                                                                                                                                                                                                                                                                                                                                                                                                                                                                                                                                                           |
|             | <b>Analytical Complexity<sup>1</sup></b> | <u>Low</u> - Non-computational tasks can be completed without specialized knowledge or training<br><u>Medium</u> - Some specific knowledge or training is required to complete computational tasks<br><u>High</u> - Process requires a high level of specialized knowledge or training to conduct the analysis                                                                                                                                                                                                                                                                                                                                                                                                                                 |
|             | <b>Interactions<sup>1</sup></b>          | Does the method explicitly consider interactions among factors?<br>( <u>Yes</u> / <u>No</u> )                                                                                                                                                                                                                                                                                                                                                                                                                                                                                                                                                                                                                                                  |
|             | <b>Sources of data<sup>2</sup></b>       | Open coding of source of data for the study (e.g. surveys, interviews, focus groups, observations, etc.)                                                                                                                                                                                                                                                                                                                                                                                                                                                                                                                                                                                                                                       |
|             | <b>Factors<sup>2</sup></b>               | Open coding of factors included in the study and count (e.g. finance, hardware, regulations)                                                                                                                                                                                                                                                                                                                                                                                                                                                                                                                                                                                                                                                   |
|             | <b>Method Application<sup>1</sup></b>    | <u>Analysis</u> – Application of an established analytical method, presented without a broader theory on how it should be applied, or steps for applying it (e.g. system dynamics modeling of rural water functionality)<br><u>Tool</u> – A discrete, standalone activity or analysis presented with sufficient detail to be readily replicated; or, an analytical program or software (e.g. asset management tool for water utilities)<br><u>Framework</u> – A guiding outline of activities, analyses or procedures for applying the method (e.g. Sanitation Cityscape Conceptual Framework)<br><u>Approach</u> – A theoretical or conceptual construct, without discrete steps for implementation of the method (e.g. Livelihoods Approach) |
| Scope       | <b>Aspects of WASH<sup>1</sup></b>       | <u>Water</u> , <u>Sanitation</u> and/or <u>Hygiene</u>                                                                                                                                                                                                                                                                                                                                                                                                                                                                                                                                                                                                                                                                                         |
|             | <b>Outcome Scope<sup>2</sup></b>         | Emergent coding of study outcomes or dependent variable (e.g. behavior change, service sustainability)                                                                                                                                                                                                                                                                                                                                                                                                                                                                                                                                                                                                                                         |
|             | <b>Context<sup>1</sup></b>               | <u>Rural</u> / <u>Urban</u><br><u>Local (incl community)</u> , <u>City</u> , <u>Regional (incl District)</u> , <u>National</u> , <u>Sector</u>                                                                                                                                                                                                                                                                                                                                                                                                                                                                                                                                                                                                 |
| Application | <b>Project Application<sup>1</sup></b>   | Assessment of what stage, if any, the study was implemented in relation to a WASH infrastructure or services project:<br><u>Planning</u> – Used to plan future WASH service delivery project;<br><u>Implementation</u> – Method used to guide the implementation of a WASH project<br><u>Evaluation</u> – Post-project assessment of outcomes<br><u>Case Study</u> – Standalone analysis of a specific case(s), not related to a WASH project<br><u>None</u> – No project application conducted                                                                                                                                                                                                                                                |

|  |                                         |                                                                                                                |
|--|-----------------------------------------|----------------------------------------------------------------------------------------------------------------|
|  | <b>Location<sup>1</sup></b>             | <u>Name</u> and <u>count</u> of geographic locations where study was applied                                   |
|  | <b>Reporting of Impacts<sup>2</sup></b> | Stated outcomes or effects on WASH services that occurred as a result of the application of the study (if any) |

Secondary Screening Criteria Coding Form including Attributes, Descriptors and Evaluation Criteria. Notes: 1: a-priori, deductive criteria; 2: open or emergent criteria

Table SI3-2: Literature Search Worksheet

| Document Information |             |                                                                                                                                                         |                                                                                                            |      |                                                                                  |               |             | Method                                                                            |                       |                      |                                                                 |                                                                                                               | Scope              |                          |               |                          |                | Application         |                                                                                                          |                                                    |                |               | Resources                                                      |                 |          |
|----------------------|-------------|---------------------------------------------------------------------------------------------------------------------------------------------------------|------------------------------------------------------------------------------------------------------------|------|----------------------------------------------------------------------------------|---------------|-------------|-----------------------------------------------------------------------------------|-----------------------|----------------------|-----------------------------------------------------------------|---------------------------------------------------------------------------------------------------------------|--------------------|--------------------------|---------------|--------------------------|----------------|---------------------|----------------------------------------------------------------------------------------------------------|----------------------------------------------------|----------------|---------------|----------------------------------------------------------------|-----------------|----------|
| Document ID          | Database    | Title                                                                                                                                                   | Author(s)                                                                                                  | Date | Publication                                                                      | Document Type | Open Access | Method Analysis                                                                   | Analytical Complexity | Interaction Analysis | Data Source Analysis                                            | Factors                                                                                                       | Method Application | Aspects of WASH          | Rural / Urban | Context                  | Outcome Scope  | Project Application | Location                                                                                                 | Location Region                                    | Location Count | Study Impacts | Time                                                           | Human Resources | Cost     |
| 2                    | Hand Search | Understanding handpump sustainability: Determinants of Rural water source functionality in the Greater Afram Plains region of Ghana                     | M. Fisher, K. Shields, T. Chan, E. Christenson, R. Cronk, H. Leke, D. Samani, P. Apoya, A. Lutz, J. Barram | 2015 | Water Resources Research                                                         | Peer          | X           | Bayesian Networks                                                                 | High                  | Yes                  | Secondary Data                                                  | Social Financial Technical Environmental Context                                                              | Analysis           | Water                    | Rural         | Regional                 | Sustainability | Case Study          | Greater Afram Plains region of Ghana                                                                     | West Africa                                        | 1              |               |                                                                |                 |          |
| 5                    | Hand Search | Assessment of Sustainability of Rural Water, Sanitation, and Hygiene Interventions in Rwanda                                                            | M. Malik, L. Karangwa, A. Muzila, J. Sano, J.M. Rutaganda, G. Musabyimana                                  | 2016 | RWSN                                                                             | Peer          | X           | Composite Scoring                                                                 | High                  | No                   | Surveys Interviews Secondary Data                               | Institutional Social Financial Technical                                                                      | Tool               | WASH                     | Rural         | Regional                 | Sustainability | Evaluation          | Rural Rwanda                                                                                             | East Africa                                        | 1              |               | 4 months                                                       |                 | \$85,000 |
| 6                    | Hand Search | Against the Current: How to Shape an Enabling Environment for Sustainable Water Service Delivery in Nigeria                                             | H. Hima, C. Santibanez, H. Kida, K. Ban                                                                    | 2015 | Global Delivery Initiative                                                       | Grey          | X           | Qualitative Data Analysis                                                         | High                  | No                   | Interviews Secondary Data Primary Data Observation Focus Groups | Governance Institutional Capacity Services Social Financial Political Coordination                            | Analysis           | Water                    | Rural Urban   | Regional National Sector | Sustainability | Evaluation          | Nigeria                                                                                                  | West Africa                                        | 1              |               |                                                                |                 |          |
| 7                    | Hand Search | Rural Water Supply and Sanitation in Developing Countries                                                                                               | S. Bhattarai and M. Starkle                                                                                | 2005 | International Symposium on the Analytic Hierarchy Process                        | Peer          | X           | AHP Multi-Criteria Decision Analysis                                              | Medium                | No                   | Secondary data Primary Data Surveys Expert Opinion              | Institutional Social Environmental Financial Technical                                                        | Analysis           | Water Sanitation         | Rural         | Local Regional           | Sustainability | Planning            | Nepal                                                                                                    | South Asia                                         | 1              |               |                                                                |                 |          |
| 8                    | Hand Search | Analytical Hierarchy Process for Rural Micro Project Sustainability Monitoring in Nepal                                                                 | S. Bhattarai and B. Adhikari                                                                               | 2005 | International Symposium on the Analytic Hierarchy Process                        | Peer          | X           | AHP Multi-Criteria Decision Analysis                                              | Medium                | No                   | Expert Opinion Interviews Focus Groups Observation              | Technical Institutional Social Environmental Financial Behavioral                                             | Tool               | Water Sanitation Hygiene | Rural Urban   | Local                    | Sustainability | Evaluation          | 13 districts of Nepal (4 rural, 9 hill and 3 urban projects)                                             | South Asia                                         | 13             |               |                                                                |                 |          |
| 9                    | Hand Search | Building environments to support sustainability of improved sanitation behaviours at scale: levers of change in East Asia                               | N. Mukherjee                                                                                               | 2016 | Practical Action                                                                 | Grey          | X           | Framework Theory of Change                                                        | High                  | No                   | Secondary Data                                                  | Institutional Financial Capacity Social Monitoring                                                            | Framework          | Sanitation               | Rural         | National Sector          | Sustainability | Case Study          | Lao Vietnam Indonesia                                                                                    | South Asia                                         | 3              |               |                                                                |                 |          |
| 10                   | Hand Search | Going beyond mason training: enabling, facilitating, and engaging Rural sanitation markets for the base of the pyramid                                  | J. Dumpert and E. Perez                                                                                    | 2015 | Waterlines                                                                       | Peer          |             | Market Based-Approach Framework                                                   | Low                   | No                   | Secondary Data                                                  | Policy Social Infrastructure Financial Coordination Capacity Monitoring Private Sector                        | Framework          | Sanitation               | Rural         | National Sector          | Sustainability | Evaluation          | Cambodia Indonesia Lao Philippines Vietnam Peru Ethiopia Kenya Tanzania Uganda Bangladesh India Pakistan | South Asia Southeast Asia East Africa Central Asia | 22             |               |                                                                |                 |          |
| 14                   | Hand Search | Using Causal Loop Diagramming to Explore the Drivers of the Sustained Functionality of Rural Water Services in Timor-Leste                              | K. Neely and J. Walters                                                                                    | 2016 | Sustainability Journal                                                           | Peer          | X           | System Dynamics Causal Loop Diagramming                                           | High                  | Yes                  | Surveys Interviews Observation Expert opinion                   | Donors NGOs Technical ODM Financial Social                                                                    | Analysis           | Water                    | Rural         | Local                    | Sustainability | Case Study          | Timor-Leste                                                                                              | Southeast Asia                                     | 1              |               |                                                                |                 |          |
| 15                   | Hand Search | A Framework to Assess Sustainability of Community-based Water Projects Using Multi-Criteria Analysis                                                    | K. Panthi and S. Bhattarai                                                                                 | 2008 | First International Conference on Construction in Developing Countries (ICCDC-8) | Peer          | X           | AHP Multi-Criteria Decision Analysis                                              | Medium                | No                   | Observation Focus Groups Interviews Primary Data                | Technical Environmental Social Institutional Financial                                                        | Tool Framework     | Water                    | Rural         | Local                    | Sustainability | Case Study          | 16 communities in Nepal                                                                                  | South Asia                                         | 1              |               |                                                                |                 |          |
| 19                   | Hand Search | A planning-oriented sustainability assessment framework (POSAF) for peri-urban water management in developing countries                                 | N. Starkle, M. Brunner, E. Lopez, J. Martinez-Ruiz                                                         | 2013 | Water Research                                                                   | Peer          |             | Framework Social Network Analysis Multi-Criteria Decision Analysis AHP Statistics | High                  | No                   | Focus Groups Interviews Surveys                                 | Technical Economic Networks Environmental Institutional Financial Urban                                       | Tool Framework     | Water                    | Urban         | City                     | Sustainability | Planning            | Xochmilco, Mexico                                                                                        | Central America                                    | 1              | Coordination  |                                                                |                 |          |
| 21                   | Hand Search | Management of Rural water services in Nicaragua: a systemic network approach to evaluating stakeholder alignment                                        | J. Walters and A. Javernick-Will                                                                           | 2015 | International Journal of Sustainable Development & World Ecology                 | Peer          |             | Qualitative Data Analysis Social Network Analysis System Dynamics                 | High                  | Yes                  | Focus Groups                                                    | Technical Management Community Social Governance Technical Environmental Functionality Financial Coordination | Analysis           | Water                    | Rural         | Local                    | Sustainability | Case Study          | Ternabona, Nicaragua                                                                                     | Central America                                    | 1              |               | Stakeholder Focus group sessions lasting between 2 and 3 hours |                 |          |
| 22                   | Hand Search | Long-Term Functionality of Rural Water Services in Developing Countries: A System Dynamics Approach to Understanding the Dynamic Interaction of Factors | J. Walters and A. Javernick-Will                                                                           | 2015 | Environmental Science & Technology                                               | Peer          |             | System Dynamics                                                                   | High                  | Yes                  | Secondary Data Expert Opinion                                   | Functionality Governance Financial Technical Environmental Energy Community Management                        | Analysis           | Water                    | Rural         | Local                    | Sustainability | Case Study          |                                                                                                          |                                                    |                |               |                                                                |                 |          |
| 23                   | Hand Search | Exploring the use of social network analysis to inform exit strategies for Rural water and sanitation NGOs                                              | J. Walters                                                                                                 | 2016 | Engineering Project Organization Journal                                         | Peer          |             | Social Network Analysis                                                           | High                  | Yes                  | Interviews Surveys                                              | Coordination NGOs Networks Technical Functionality                                                            | Analysis           | Water Sanitation         | Rural         | Local                    | Sustainability | Case Study          | Dario, Nicaragua                                                                                         | Central America                                    | 1              |               |                                                                |                 |          |
| 25                   | Hand Search | Planning Rural water services in Nicaragua: A systems-based analysis of impact factors using graphical modeling                                         | J. Walters and P. Chirnowsky                                                                               | 2016 | Environmental Science & Policy                                                   | Peer          |             | Graphic Modeling Statistics Network Analysis                                      | High                  | Yes                  | Interviews Observation Primary Data                             | Governance Community Management Financial Technical Environmental Energy Functionality                        | Analysis           | Water                    | Rural         | Local                    | Access         | Case Study          | Rural communities in Dario, and Ternabona in Nicaragua                                                   | Central America                                    | 1              |               |                                                                |                 |          |
| 27                   | Hand Search | Rethinking Sustainability, Scaling Up, and Enabling Environment: A Framework for Their Implementation in Drinking Water Supply                          | U. Anjad, E. Ojomo, K. Downs, R. Cronk, J. Barram                                                          | 2015 | Water                                                                            | Peer          | X           | Framework                                                                         | Low                   | No                   | Secondary Data                                                  | Implementation Functionality                                                                                  | Analysis           | Water                    | Rural Urban   | Local                    | Sustainability | Case Study          |                                                                                                          |                                                    |                |               |                                                                |                 |          |

|    |             |                                                                                                       |                                                             |      |        |     |   |                               |        |    |                                                                |                                                                                                  |                               |            |                |                    |                |            |                                         |                                                              |   |  |  |  |  |
|----|-------------|-------------------------------------------------------------------------------------------------------|-------------------------------------------------------------|------|--------|-----|---|-------------------------------|--------|----|----------------------------------------------------------------|--------------------------------------------------------------------------------------------------|-------------------------------|------------|----------------|--------------------|----------------|------------|-----------------------------------------|--------------------------------------------------------------|---|--|--|--|--|
| 29 | Hand Search | The Political Economy of Sanitation: How can we increase investment and improve service for the poor? | S. Garbarino, J. Holland, S. Brook, K. Caplan, A. Shankland | 2011 | WSP    | Org | X | Framework                     | Medium | No | Secondary Data<br>Interviews<br>Focus Groups                   | Social<br>Political<br>Economic                                                                  | Framework                     | Sanitation | Rural<br>Urban | National<br>Sector | Sustainability | Evaluation | Brazil<br>India<br>Indonesia<br>Senegal | South America<br>Southeast Asia<br>South Asia<br>West Africa | 4 |  |  |  |  |
| 30 | Hand Search | Strengthening Enabling Environment for WASH                                                           | D. Tsetse, E. Kouassi-Komlan, C. Scharp, G. Hutton          | 2016 | UNICEF | Org | X | Framework<br>Theory of Change | Medium | No | Expert Opinion<br>Primary Data<br>Secondary Data<br>Interviews | Institutional<br>Financial<br>Governance<br>Monitoring<br>Infrastructure<br>Planning<br>Services | Framework<br>Approach<br>Tool | WASH       | Rural<br>Urban | National<br>Sector | Sustainability |            |                                         |                                                              |   |  |  |  |  |

| Document Information |             |                                                                                                                                                                |                                                                                 |      |                                              |               |             | Method                                                             |                       |                      |                                                            |                                                                                                        |                         | Scope              |               |                       |                 | Application                          |                                                                                                                                                                                                                                                                |                                                      |                |                        | Resources                                                                |                                                                                                                                                                                                                                                                                  |                                                                                                                                                                                                                                                                                                    |
|----------------------|-------------|----------------------------------------------------------------------------------------------------------------------------------------------------------------|---------------------------------------------------------------------------------|------|----------------------------------------------|---------------|-------------|--------------------------------------------------------------------|-----------------------|----------------------|------------------------------------------------------------|--------------------------------------------------------------------------------------------------------|-------------------------|--------------------|---------------|-----------------------|-----------------|--------------------------------------|----------------------------------------------------------------------------------------------------------------------------------------------------------------------------------------------------------------------------------------------------------------|------------------------------------------------------|----------------|------------------------|--------------------------------------------------------------------------|----------------------------------------------------------------------------------------------------------------------------------------------------------------------------------------------------------------------------------------------------------------------------------|----------------------------------------------------------------------------------------------------------------------------------------------------------------------------------------------------------------------------------------------------------------------------------------------------|
| Document ID          | Database    | Title                                                                                                                                                          | Author(s)                                                                       | Date | Publication                                  | Document Type | Open Access | Method Analysis                                                    | Analytical Complexity | Interaction Analysis | Data Source Analysis                                       | Factors                                                                                                | Method Application      | Aspects of WASH    | Rural / Urban | Context               | Outcome Scope   | Project Application                  | Location                                                                                                                                                                                                                                                       | Location Region                                      | Location Count | Study Impacts          | Time                                                                     | Human Resources                                                                                                                                                                                                                                                                  | Cost                                                                                                                                                                                                                                                                                               |
| 32                   | Hand Search | Whole system change: capturing the change process in the Ghana Rural water sub-sector                                                                          | H. Lockwood and V. Duff                                                         | 2015 | IRC WASH                                     | Org           | X           | Collective Impact Whole Systems Approach Service Delivery Approach | Low                   | No                   | Primary Data Secondary Data Focus Groups                   | Institutional Financial Coordination Governance Regulations                                            | Approach Framework      | Water              | Rural         | Local National Sector | Sustainability  | Planning Implementing Evaluation     | Ghana                                                                                                                                                                                                                                                          | West Africa                                          | 1              | Policy Services        | The long time frame – at least six years and potentially up to ten years | The backbone support was provided by a mix of IRC staff assigned to the project and Triple-S project staff hired specifically for the project and hosted by CWSA. A much larger number of people also provided support to the project on a part-time basis, including both Ghana | From 2009 to the end of May 2013 the total costs of running Triple-S in Ghana for IRC have been US\$ 3,469,924. This price tag includes all international staff support, but does not include other investments made by IRC Ghana through activities under WASHCost and the Tripartite Partnership |
| 37                   | Hand Search | A qualitative comparative analysis of well-managed school sanitation in Bangladesh                                                                             | C. Chatterley, A. Javemick-Will, K. Linden, K. Alam, L. Botinelli, M. Venkatesh | 2013 | BioMed Central                               | Peer          | X           | QCA Qualitative                                                    | High                  | No                   | Interviews Focus Groups Observation                        | Services Technical Community Governance User Cognizance O&M                                            | Analysis                | Sanitation         | Rural         | Local                 | Sustainability  | Case Study                           | 16 case schools in Meherpur, Bangladesh                                                                                                                                                                                                                        | South Asia                                           | 1              |                        |                                                                          |                                                                                                                                                                                                                                                                                  |                                                                                                                                                                                                                                                                                                    |
| 41                   | Hand Search | Community Assessment Model for Sustainable Municipal Sanitation Services in low income communities                                                             | G. Louis and M. Bouabd                                                          | 2004 | International Council on Systems Engineering | Peer          |             | Framework Composite Scoring                                        | Medium                | No                   | Expert Opinion Secondary Data                              | Institutional Capacity Technical Economic Financial Energy Environmental Cultural                      | Tool                    | Sanitation         |               | Local                 | Sustainability  | Evaluation                           |                                                                                                                                                                                                                                                                |                                                      |                |                        |                                                                          |                                                                                                                                                                                                                                                                                  |                                                                                                                                                                                                                                                                                                    |
| 42                   | Hand Search | A decision model for selecting sustainable drinking water supply and greywater reuse systems for developing communities with a case study in Cimahi, Indonesia | J. Henriques and G. Louis                                                       | 2010 | Journal of Environmental Management          | Peer          | X           | Composite Scoring                                                  | High                  | Yes                  | Interviews Secondary Data Observation                      | Functionality Institutional Capacity Technical Economic Financial Energy Environmental Social Cultural | Tool                    | Water              | Urban         | Local                 | Sustainability  | Planning Case Study                  | Cimahi, Indonesia                                                                                                                                                                                                                                              | Southeast Asia                                       | 1              |                        |                                                                          |                                                                                                                                                                                                                                                                                  |                                                                                                                                                                                                                                                                                                    |
| 43                   | Hand Search | Introducing SanFOAM: A Framework to Analyse Sanitation Behaviors to Design Effective Sanitation Programs                                                       | J. Devine                                                                       | 2009 | World Bank                                   | Grey          | X           | Framework                                                          | Medium                | No                   | Secondary Data                                             | Technical Financial Behavioral Regulations Social                                                      | Approach Framework      | Sanitation         | Rural Urban   | Local City            | Sustainability  | Planning Implementation              | Tanzania (10 districts), Indonesia (East Java), and India (in two states—Madhya Pradesh and Himachal Pradesh)                                                                                                                                                  | East Africa South Asia Southeast Asia                | 3              |                        |                                                                          |                                                                                                                                                                                                                                                                                  |                                                                                                                                                                                                                                                                                                    |
| 44                   | Hand Search | A Suite of Tools to Support a Systems-Based Approach to Sustainable Management of Water Service Delivery                                                       | K. Lemme, K. Latham, K. Kugler                                                  | 2016 | Water For People                             | Org           | X           | Composite Scoring                                                  | Medium                | No                   | Interviews Primary data Secondary Data                     | Services Institutional Financial Environmental Management O&M Monitoring                               | Tool Framework          | Water              | Rural Urban   | Regional              | Sustainability  | Implementation Evaluation Case Study | Applied in 30 districts in 5 countries. Results presented from: Kamwenge District, Uganda; Praganas District, India (District name?); Peru (rural district), Malawi Sagar Island, India; Ruindo, Rwanda; San Rafael del Norte, Nicaragua; El Negrito, Honduras | East Africa South Asia Central America South America | 30             | Financial              |                                                                          |                                                                                                                                                                                                                                                                                  |                                                                                                                                                                                                                                                                                                    |
| 47                   | Hand Search | Synthesis of Four Country Enabling Environment Assessments for Scaling Up Handwashing Programs                                                                 | F. Rosenweig                                                                    | 2008 | World Bank                                   | Grey          | X           | Composite Scoring                                                  | Medium                | No                   | Expert Opinions Observations Secondary Data                | Policy Coordination Institutional Capacity Technical Financial Implementation Monitoring               | Tool                    | Sanitation Hygiene | Rural         | National              | Behavior Change | Planning Implementation Evaluation   | Peru Senegal Tanzania Vietnam                                                                                                                                                                                                                                  | South America West Africa East Africa Southeast Asia | 4              | Behavior Change Uptake |                                                                          |                                                                                                                                                                                                                                                                                  |                                                                                                                                                                                                                                                                                                    |
| 50                   | Hand Search | Governance into Functionality (GIFT) Tool                                                                                                                      | S. Ogden                                                                        | 2013 | CARE                                         | Grey          | X           | Composite Scoring                                                  | Medium                | No                   | Local Expert Opinion                                       | Governance Financial Management Users Functionality                                                    | Tool                    | Water Sanitation   |               | Local                 | Sustainability  | Evaluation                           |                                                                                                                                                                                                                                                                |                                                      |                |                        | 3-10 community members                                                   |                                                                                                                                                                                                                                                                                  |                                                                                                                                                                                                                                                                                                    |
| 52                   | Hand Search | Methodology for Participatory Assessment (MPA)                                                                                                                 | R. Dayal, C. van Wijk, N. Mukherjee                                             | 2000 | WSP, IRC WASH                                | Org           | X           | Framework Statistics Participatory Composite Scoring               | High                  | No                   | Surveys Interviews Observation Primary Data Secondary Data | Gender Technical Social Hygiene Participation Institutional Users Social Community Policy              | Approach Tool Framework | Water Sanitation   |               | Local                 | Sustainability  | Planning Evaluation                  | Eighteen assessments across 18 communities in 15 countries, (no mention of locations)                                                                                                                                                                          | (no mention of locations in report)                  | 18             |                        |                                                                          |                                                                                                                                                                                                                                                                                  |                                                                                                                                                                                                                                                                                                    |
| 53                   | Hand Search | A model for assessing sustainability A web-based decision support system for predicting and evaluating sustainability (Toppes)                                 | S. Takougan and J. Wethe                                                        | 2016 | Arima Journal                                | Peer          | X           | Composite Scoring Multi-Criteria Decision Analysis                 | Medium                | No                   | Expert Opinion                                             | Socioeconomic Services Environmental Technical Financial O&M Institutional                             | Tool Framework          | Water              | Rural         | Local Regional        | Sustainability  | Evaluation                           | Greater Afram Plains region of Ghana                                                                                                                                                                                                                           | West Africa                                          | 1              |                        |                                                                          |                                                                                                                                                                                                                                                                                  |                                                                                                                                                                                                                                                                                                    |
| 54                   | Hand Search | The SIASAR Initiative: An Information System for More Sustainable Rural Water and Sanitation Services                                                          | L. Pena, D. Michaud, J. Blau                                                    | 2013 | World Bank                                   | Grey          | X           | SIASAR Composite Scoring                                           | Low                   | No                   | Observation Primary Data Interviews Expert Opinion         | Access Management Functionality Hygiene Health Financial O&M                                           | Tool                    | Water Sanitation   | Rural         | Local Regional        | Sustainability  | Evaluation                           | Nicaragua Panama Honduras                                                                                                                                                                                                                                      | Central America                                      | 3              |                        |                                                                          |                                                                                                                                                                                                                                                                                  |                                                                                                                                                                                                                                                                                                    |

|    |             |                                                                                                                                                            |                                                                                                |      |                       |      |   |                               |     |    |                           |                                                                                     |      |                     |       |       |        |            |                 |         |   |                                                                                                                                                                       |                          |  |
|----|-------------|------------------------------------------------------------------------------------------------------------------------------------------------------------|------------------------------------------------------------------------------------------------|------|-----------------------|------|---|-------------------------------|-----|----|---------------------------|-------------------------------------------------------------------------------------|------|---------------------|-------|-------|--------|------------|-----------------|---------|---|-----------------------------------------------------------------------------------------------------------------------------------------------------------------------|--------------------------|--|
| 56 | Hand Search | Addressing WaSH challenges in Pacific Island Countries: A participatory marketing systems mapping approach to empower informal settlement community action | S. Saunders, D. Barrington, S. Sridharan, S. Meo, W. Hadwen, K. Shields, R. Souler, J. Bartram | 2016 | Habitat International | Peer | X | Participatory Systems Mapping | Low | No | Interviews<br>Observation | Technical Context<br>Networks<br>Private Sector<br>Socioeconomic<br>User Committees | Tool | Water<br>Sanitation | Urban | Local | Access | Case Study | Suva City, Fiji | Oceania | 1 | chairman of the informal settlement invited the research team to visit the community over a two-week period to specifically undertake the systems mapping activities. | Two-person research team |  |
|----|-------------|------------------------------------------------------------------------------------------------------------------------------------------------------------|------------------------------------------------------------------------------------------------|------|-----------------------|------|---|-------------------------------|-----|----|---------------------------|-------------------------------------------------------------------------------------|------|---------------------|-------|-------|--------|------------|-----------------|---------|---|-----------------------------------------------------------------------------------------------------------------------------------------------------------------------|--------------------------|--|

| Document Information |             |                                                                                                                          |                                                                    |      |                                                                   |               |             | Method                                                                                              |                       |                      |                                                              |                                                                                                           | Scope              |                     |               |                                         | Application           |                       |                                                                                                                 |                                                           |                | Resources         |            |                                    |      |
|----------------------|-------------|--------------------------------------------------------------------------------------------------------------------------|--------------------------------------------------------------------|------|-------------------------------------------------------------------|---------------|-------------|-----------------------------------------------------------------------------------------------------|-----------------------|----------------------|--------------------------------------------------------------|-----------------------------------------------------------------------------------------------------------|--------------------|---------------------|---------------|-----------------------------------------|-----------------------|-----------------------|-----------------------------------------------------------------------------------------------------------------|-----------------------------------------------------------|----------------|-------------------|------------|------------------------------------|------|
| Document ID          | Database    | Title                                                                                                                    | Author(s)                                                          | Date | Publication                                                       | Document Type | Open Access | Method Analysis                                                                                     | Analytical Complexity | Interaction Analysis | Data Source Analysis                                         | Factors                                                                                                   | Method Application | Aspects of WASH     | Rural / Urban | Context                                 | Outcome Scope         | Project Application   | Location                                                                                                        | Location Region                                           | Location Count | Study Impacts     | Time       | Human Resources                    | Cost |
| 57                   | Hand Search | Water and Sanitation Hygiene Bottleneck Analysis Tool (WASH BAT 2.0) User Manual                                         | UNICEF (Uncredited)                                                | 2016 | WASH BAT                                                          | Grey          | X           | Composite Scoring                                                                                   | Medium                | No                   | Local Expert Opinion                                         | Regulations<br>Financial<br>Private Sector<br>O&M<br>Social<br>Environmental                              | Tool Framework     | WASH                | Rural Urban   | National                                | Sustainability Access | Evaluation Planning   |                                                                                                                 |                                                           |                |                   |            |                                    |      |
| 59                   | Hand Search | Assessing Women's Negative Sanitation Experiences and Concerns: The Development of a Novel Sanitation Insecurity Measure | B. Caruso, T. Clasen, K. Youn, H. Cooper, C. Hadley, R. Haardörfer | 2017 | International Journal of Environmental Research and Public Health | Peer          | X           | Framework Statistics                                                                                | High                  | Yes                  | Interviews<br>Focus Groups<br>Surveys                        | Social<br>Technical<br>Technical<br>Community<br>Behavioral                                               | Tool               | Sanitation          | Rural         | Local                                   | Access                | Case Study            | Puri district, Odisha, India                                                                                    | South Asia                                                | 1              |                   |            |                                    |      |
| 60                   | Hand Search | WASH Sustainability Index Tool (SIT) Comparative Analysis                                                                | J. Annis and L. Moreland                                           | 2015 | WASH Plus                                                         | Org           | X           | Composite Scoring                                                                                   | High                  | No                   | Interviews<br>Focus Groups<br>Secondary Data                 | Institutional<br>Management<br>Financial<br>Environmental<br>Technical                                    | Tool               | WASH                | Rural Urban   | National                                | Sustainability        | Evaluation            | Burkina Faso<br>Dominican Republic<br>Ethiopia<br>Ghana<br>Kenya<br>Liberia<br>Niger<br>Philippines<br>Tanzania | East Africa<br>Caribbean<br>West Africa<br>Southeast Asia | 9              | Uptake            | 2-6 Months | \$15-150k<br>Avg - \$50k / country |      |
| 63                   | Hand Search | Sanitation Monitoring Toolkit                                                                                            | UNICEF (Uncredited)                                                | 2014 | UNICEF                                                            | Org           | X           | Composite Scoring Framework                                                                         | Medium                | No                   | Secondary Data<br>Expert Opinion<br>Interviews               | Financial<br>Policy<br>Planning<br>Social<br>O&M<br>Institutional<br>Private Sector<br>Coordination       | Tool Framework     | Sanitation          | Rural         | Local<br>Regional<br>National           | Access Sustainability | Evaluation            |                                                                                                                 |                                                           |                |                   |            |                                    |      |
| 64                   | Hand Search | Modeling the Complexities of Water, Hygiene, and Health in Limpopo Province, South Africa                                | J. Mellor, J. Smith, G. Lesamonth, V. Ntshandama, R. Dillingha     | 2012 | Environmental Science & Technology                                | Peer          | X           | System Dynamics                                                                                     | High                  | Yes                  | Secondary Data                                               | Environmental<br>Technical<br>Technical                                                                   | Analysis           | Water               | Rural         | Local                                   | Health                | Case Study            | (2) communities in South Africa                                                                                 | South Asia                                                | 2              |                   |            |                                    |      |
| 65                   | Hand Search | Developing A Systems Understanding of Rural Water Supply in Timor-Leste                                                  | K. Neely and J. Walters                                            | 2015 | Deakin University                                                 | Peer          | X           | Social Network Analysis<br>Causal Loop<br>Diagramming                                               | High                  | Yes                  | Interviews<br>Observation<br>Focus Groups                    | Community<br>Networks<br>Management<br>NGOs<br>Coordination<br>Social<br>Economic<br>Environmental<br>O&M | Analysis Approach  | Water               | Rural         | Local                                   | Access Sustainability | Case Study            | (5) Rural villages<br>Timor-Leste                                                                               | Southeast Asia                                            | 5              |                   |            |                                    |      |
| 66                   | Hand Search | A systems approach to sustainable water operation & maintenance in Uganda                                                | N. Mary                                                            | 2016 | RWSN                                                              | Peer          | X           | Market-Based approach                                                                               | Low                   | Yes                  |                                                              | Private Sector<br>Governance<br>Regulations<br>User Committees                                            | Tool               | Water               | Rural         | Regional                                | Sustainability        | Planning Evaluation   | Bugiri and Namayingo districts, Uganda                                                                          | East Africa                                               | 2              | Services          |            |                                    |      |
| 70                   | Hand Search | Decision-making on shared sanitation in the informal settlements of Kisumu, Kenya                                        | S. Srinivas, M. Swilling, S. Cairncross                            | 2017 | International Journal of Environmental Health Research            | Peer          |             | Qualitative Data Analysis                                                                           | High                  | No                   | Interviews                                                   | Financial<br>Services<br>O&M<br>Socioeconomic                                                             | Analysis           | Sanitation          | Urban         | Local                                   | Sustainability        | Case Study            | Kisumu (informal settlements) Kenya                                                                             | East Africa                                               | 1              |                   |            |                                    |      |
| 72                   | Hand Search | Tipping Points in Community-Based Management                                                                             | G. Guerrero                                                        | 2016 | TU Delft                                                          | Peer          | X           | System Dynamics<br>Causal Loop<br>Diagramming                                                       | High                  | Yes                  | Interviews<br>Secondary Data                                 | Policy<br>Management<br>Community<br>Financial<br>Environmental<br>Access                                 | Tool               | Water               | Rural         | Regional                                | Sustainability        | Case Study            | Kabarole, Uganda                                                                                                | East Africa                                               | 1              |                   |            |                                    |      |
| 73                   | Hand Search | Implementing sustainable water and sanitation projects in Rural, developing communities                                  | R. Barnes, N. Ashbolt, D. Roser, P. Brown                          | 2014 | Waterlines                                                        | Peer          | X           | Qualitative Data Analysis                                                                           | Medium                | No                   | Interviews                                                   | Community<br>Planning<br>Social<br>Implementation<br>Technical<br>Governance                              | Analysis           | Water<br>Sanitation | Rural         | Local                                   | Sustainability        | Case Study            |                                                                                                                 |                                                           |                |                   |            |                                    |      |
| 74                   | Hand Search | The Role of Learning in Water Supply Systems: Analyzing the Spread of Policies in Rural Uganda using Memetics            | K. Kripschild                                                      | 2016 | TU Delft                                                          | Peer          | X           | System Dynamics<br>Agent Based<br>Modeling                                                          | High                  | Yes                  | Secondary Data                                               | Capacity<br>Financial<br>Functionality<br>Coordination<br>Education<br>Technical<br>O&M                   | Tool               | Water               | Rural         | Regional<br>National                    | Sustainability        | Case Study            | Uganda                                                                                                          | East Africa                                               | 1              |                   |            |                                    |      |
| 77                   | Hand Search | Revealing causal pathways to sustainable water service delivery using ISOCA                                              | K. Gasparro and J. Walters                                         | 2017 | Journal of Water, Sanitation and Hygiene for Development          | Peer          |             | Qualitative<br>Comparative<br>Analysis                                                              | High                  | No                   | Secondary Data<br>Interviews                                 | Community<br>Technical<br>User Committees<br>Financial<br>Coordination<br>Education                       | Analysis           | Water               | Rural         | Local                                   | Sustainability        | Case Study            | 26 projects implemented by EWB across multiple countries                                                        |                                                           | 26             |                   |            |                                    |      |
| 78                   | Hand Search | Improving the robustness of financial and economic analysis of sanitation systems                                        | J. Parkinson and S. Blume                                          | 2010 | IRC WASH Symposium 2010: Pumps, Pipes and Promises                | Org           | X           | Financial Analysis                                                                                  | Low                   | No                   | Secondary Data                                               | Technical<br>Agriculture<br>Financial<br>Health<br>Implementation<br>Environmental<br>Economic            | Analysis           | Sanitation          |               | Local                                   | Sustainability        | Planning Case Study   | Uganda<br>South Africa<br>Burkina Faso                                                                          | East Africa<br>South Africa<br>West Africa                | 3              |                   |            |                                    |      |
| 80                   | Hand Search | Towards systemic change in urban sanitation                                                                              | G. Galli, C. Ntshombi, E. Baertings                                | 2014 | IRC WASH                                                          | Org           | X           | Whole Systems<br>Approach<br>Service Delivery<br>Approach<br>Self Flow Diagrams<br>Theory of Change | Medium                | No                   | Focus groups<br>Interviews<br>Primary data<br>Secondary data | Financial<br>Institutional<br>Environmental<br>Technical<br>Social                                        | Approach Framework | Sanitation          | Urban         | Local<br>Regional<br>National           | Sustainability        | Planning Implementing | Ghana<br>Uganda                                                                                                 | West Africa<br>East Africa                                | 2              | Users<br>Services |            |                                    |      |
| 81                   | Hand Search | The Triple-S Theory of Change                                                                                            | T. Schouten and P. Moriarty                                        | 2013 | IRC WASH                                                          | Org           | X           | Framework<br>Service Delivery<br>Approach<br>Theory of Change                                       | Low                   | No                   | Secondary Data                                               | Political<br>Coordination<br>Institutional<br>Monitoring<br>Capacity<br>Policy<br>Financial<br>Planning   | Approach           | Water               | Rural         | Local<br>Regional<br>National<br>Sector | Sustainability        | Planning Implementing | Ghana<br>Uganda<br>Mozambique<br>Burkina Faso                                                                   | East Africa<br>West Africa                                | 4              |                   |            |                                    |      |
| 82                   | Hand Search | Systems Approach to Climate, Water, and Diarrhea in Huddi-Dharnad, India                                                 | J. Mellor, E. Kumpel, A. Encumen, J. Zimmerman                     | 2016 | Environmental Science & Technology                                | Peer          |             | Agent Based Modeling                                                                                | High                  | Yes                  | Primary data<br>Secondary data                               | Climate<br>Technical<br>Environmental<br>Health<br>Services                                               | Tool Framework     | Water               | Urban         | City                                    | Health                | Case Study            | Huddi-Dharnad in Karnataka, India                                                                               | South Asia                                                | 1              |                   |            |                                    |      |

| Document Information |             |                                                                                                                                                           |                                                                         |      |                                         |               |             | Method                             |                       |                      |                                            |                                                                                                                          |                    | Scope            |               |                                |                | Application                      |                                                                                                                                                                                                                                                                                                                                                                                                                                                                                             |                                                               |                |                     | Resources                                                                                                                                                                                                                                                              |                                                                                                                                                                                                                                                                                |      |
|----------------------|-------------|-----------------------------------------------------------------------------------------------------------------------------------------------------------|-------------------------------------------------------------------------|------|-----------------------------------------|---------------|-------------|------------------------------------|-----------------------|----------------------|--------------------------------------------|--------------------------------------------------------------------------------------------------------------------------|--------------------|------------------|---------------|--------------------------------|----------------|----------------------------------|---------------------------------------------------------------------------------------------------------------------------------------------------------------------------------------------------------------------------------------------------------------------------------------------------------------------------------------------------------------------------------------------------------------------------------------------------------------------------------------------|---------------------------------------------------------------|----------------|---------------------|------------------------------------------------------------------------------------------------------------------------------------------------------------------------------------------------------------------------------------------------------------------------|--------------------------------------------------------------------------------------------------------------------------------------------------------------------------------------------------------------------------------------------------------------------------------|------|
| Document ID          | Database    | Title                                                                                                                                                     | Author(s)                                                               | Date | Publication                             | Document Type | Open Access | Method Analysis                    | Analytical Complexity | Interaction Analysis | Data Source Analysis                       | Factors                                                                                                                  | Method Application | Aspects of WASH  | Rural / Urban | Context                        | Outcome Scope  | Project Application              | Location                                                                                                                                                                                                                                                                                                                                                                                                                                                                                    | Location Region                                               | Location Count | Study Impacts       | Time                                                                                                                                                                                                                                                                   | Human Resources                                                                                                                                                                                                                                                                | Cost |
| 83                   | Hand Search | Consolidation, Improvement and Expansion of the Rural Water and Sanitation Information System (SIASAR)                                                    | A. Serrano, C. Fenwick, D. Sobel, G. Crespo, M. Gonzalez, C. Borja-Vega | 2017 | World Bank                              | Grey          | X           | SIASAR Composite Scoring Framework | Low                   | No                   | Surveys                                    | Services Technical Regulations O&M Financial Access Hygiene Capacity Institutional                                       | Tool Framework     | Water Sanitation | Rural         | Local Regional National        | Sustainability | Planning Implementing Evaluation | Honduras<br>Nicaragua<br>Panama<br>Dominican Republic<br>Costa Rica<br>Oaxaca (Mexico)<br>Peru<br>Bolivia<br>Colombia<br>Paraguay                                                                                                                                                                                                                                                                                                                                                           | Central America<br>South America                              | 10             | Uptake              | Without improved drinking water supply or service provider 1-2<br>With improved drinking water supply and service provider 4-8 (less according to complexity and distance to source)<br>Technical assistance provider 1                                                | The total estimated cost of the SIASAR regional initiative from FY14 to date is US\$2.69 million, 39 of which the Bank provided approximately US\$1.93 million from Trust Fund (TF)40 resources.41. Recurring costs for activities such as the General Assembly (average cost) |      |
| 84                   | Hand Search | Sustainable Services Checklist                                                                                                                            | Water For People (Uncredited)                                           | 2018 | Water For People                        | Org           |             | Composite Scoring                  | Low                   | No                   | Interviews<br>Secondary Data               | Institutional Financial Management Monitoring O&M Environmental                                                          | Tool               | Water Sanitation | Rural Urban   | Regional                       | Sustainability | Evaluation                       | Arani, Bolivia<br>Arbieto, Bolivia<br>Cochumula, Bolivia<br>Pocoma, Bolivia<br>San Benito, Bolivia<br>San Pedro, Bolivia<br>Tiracua, Bolivia<br>Villa Rivero, Bolivia<br>San Andres<br>Sajcabajaj, Guatemala<br>San Antonio<br>Itotenango, Guatemala<br>San Bartolome, Guatemala<br>Santa Cruz del Quiché, Guatemala<br>Chinda, Honduras<br>El Negrito, Honduras<br>San Antonio, Honduras<br>La Concordia, Nicaragua<br>San Rafael del Norte, Nicaragua<br>Aguacatlan, Peru<br>Cascas, Peru | South America<br>Central America<br>East Africa<br>South Asia | 26             |                     | TIMELINE<br>There is pre-work, interview, and post-work to complete the SSC.<br>Timing Activity At least 2 weeks before the interview<br>Country Program staff should share relevant background information with the interviewer. Background information could include | TIMELINE<br>There is pre-work, interview, and post-work to complete the SSC.<br>Timing Activity At least 2 weeks before the interview<br>Country Program staff should share relevant background information with the interviewer. Background information could include         |      |
| 85                   | Hand Search | Priority Addressment Protocol: Understanding the Ability and Potential of Sanitation Systems to Address Priorities                                        | A. Davis, A. Javernick-Will, S. Cook                                    | 2019 | Environmental Science & Technology      | Peer          |             | Framework AHP                      | High                  | No                   | Interviews<br>Focus Groups<br>Primary Data | O&M Technical Social Financial Community                                                                                 | Framework          | Sanitation       | Urban         | City                           | Sustainability | Evaluation                       | 20 slum communities in India                                                                                                                                                                                                                                                                                                                                                                                                                                                                | South Asia                                                    | 1              |                     |                                                                                                                                                                                                                                                                        |                                                                                                                                                                                                                                                                                |      |
| 86                   | Hand Search | DWA Sustainability Monitoring Framework: The Guide                                                                                                        | Dutch Water Alliance, IRC (Uncredited)                                  | 2014 | Dutch Water Alliance                    | Org           | X           | Composite Scoring                  | Low                   | No                   | Surveys<br>Focus Groups<br>Secondary Data  | Financial Institutional Environmental Technical Social                                                                   | Tool               | WASH             | Rural         | Local Regional                 | Sustainability | Evaluation                       | Uganda<br>Ghana                                                                                                                                                                                                                                                                                                                                                                                                                                                                             | East Africa                                                   | 2              |                     |                                                                                                                                                                                                                                                                        |                                                                                                                                                                                                                                                                                |      |
| 88                   | Hand Search | Characteristics of Stakeholder Networks Supporting Local Government Performance Improvements in Rural Water Supply: Cases from Ghana, Malawi, and Bolivia | D. McNicholl, A. McRobbie, H. Cruickshank                               | 2017 | Water Alternatives                      | Peer          |             | Social Network Analysis            | High                  | Yes                  | Interviews                                 | Networks Institutional Governance Coordination                                                                           | Analysis           | Water            | Rural         | Local Regional                 | Coordination   | Case Study                       | (7) local governments in<br>(2) Ghana<br>(2) Malawi<br>(3) Bolivia                                                                                                                                                                                                                                                                                                                                                                                                                          | South America<br>East Africa<br>West Africa                   | 7              |                     |                                                                                                                                                                                                                                                                        |                                                                                                                                                                                                                                                                                |      |
| 89                   | Hand Search | An evaluative framework for urban WASH sector functionality                                                                                               | S. Drabble, R. Renou, J. Stokes                                         | 2018 | Water and Sanitation for the Urban Poor | Org           | X           | Composite Scoring                  | Low                   | No                   | Workshop<br>Surveys                        | Monitoring Coordination Regulations Financial Capacity Private Sector Policy                                             | Framework Tool     | WASH             | Urban         | National Sector                | Policy         | Evaluation Planning              | Bangladesh<br>Ghana<br>Kenya<br>Madagascar<br>Mozambique<br>Zambia                                                                                                                                                                                                                                                                                                                                                                                                                          | South Asia<br>West Africa<br>East Africa                      | 6              | Coordination Policy | Two-day long workshop                                                                                                                                                                                                                                                  |                                                                                                                                                                                                                                                                                |      |
| 90                   | Hand Search | The use of qualitative comparative analysis to identify pathways to successful and failed sanitation systems                                              | A. Davis, A. Javernick-Will, S. Cook                                    | 2019 | Science of the Total Environment        | Peer          |             | Qualitative Comparative Analysis   | High                  | Yes                  | Interviews<br>Observations<br>Primary Data | Behavioral Education O&M Community Infrastructure Governance Planning Financial                                          | Analysis           | Sanitation       | Urban         | Local                          | Functionality  | Case Study                       | 20 communities (i.e., cases) in Karnataka or Tamil Nadu, India were selected to ensure variability between outcomes and factors (i.e., causal conditions)                                                                                                                                                                                                                                                                                                                                   | South Asia                                                    | 20             |                     |                                                                                                                                                                                                                                                                        |                                                                                                                                                                                                                                                                                |      |
| 91                   | Hand Search | Building strong WASH systems for the SDGs: Understanding the WASH system and its building blocks                                                          | A. Huston and P. Moriarty                                               | 2018 | IRC WASH                                | Org           | X           | Building Blocks                    | Low                   | Yes                  | Expert Opinion<br>Secondary Data           | Policy Institutional Infrastructure Monitoring Regulations Environmental Governance Planning Education Health Management | Tool Framework     | WASH             | Rural Urban   | Local Regional National Sector | Sustainability | Evaluation Planning              |                                                                                                                                                                                                                                                                                                                                                                                                                                                                                             |                                                               |                |                     |                                                                                                                                                                                                                                                                        |                                                                                                                                                                                                                                                                                |      |
| 92                   | Hand Search | Sustainability Framework                                                                                                                                  | R. Carter, V. Casey, E. Harvey                                          | 2011 | WaterAid                                | Org           | X           | Framework                          | Low                   | No                   | Primary Data<br>Expert Opinion             | Access Infrastructure Financial Implementation Monitoring Environmental Management Donors                                | Framework          | WASH             | Rural Urban   | Local                          | Sustainability | Evaluation Planning              |                                                                                                                                                                                                                                                                                                                                                                                                                                                                                             |                                                               |                |                     |                                                                                                                                                                                                                                                                        |                                                                                                                                                                                                                                                                                |      |
| 93                   | Hand Search | Sustainability Snapshot Indicator Equity in Distribution Indicator                                                                                        | S. Sugden                                                               | 2003 | WaterAid                                | Org           | X           | Framework                          | Low                   | No                   | Primary Data<br>Surveys<br>Observations    | Financial Technical O&M Infrastructure Access                                                                            | Tool               | Water            | Rural         | Local Regional                 | Sustainability | Planning Implementation          | Malawi                                                                                                                                                                                                                                                                                                                                                                                                                                                                                      | East Africa                                                   | 1              | Uptake              |                                                                                                                                                                                                                                                                        |                                                                                                                                                                                                                                                                                |      |

| Document Information |             |                                                                                                                                                                                                                                                                                                                                                                                                                                                                                                                                                                                                      |                                           |      |                                   |               |             | Method                                            |                       |                      |                                                                          |                                                                                                                         |                    | Scope                    |               |                |                       | Application                        |                                          |                                                             |                |               |                                                                                                                                                                                                                                                                                                 | Resources                                                                                                                                                                                                                                                                       |                                                                                                                                                                                                                                                  |  |
|----------------------|-------------|------------------------------------------------------------------------------------------------------------------------------------------------------------------------------------------------------------------------------------------------------------------------------------------------------------------------------------------------------------------------------------------------------------------------------------------------------------------------------------------------------------------------------------------------------------------------------------------------------|-------------------------------------------|------|-----------------------------------|---------------|-------------|---------------------------------------------------|-----------------------|----------------------|--------------------------------------------------------------------------|-------------------------------------------------------------------------------------------------------------------------|--------------------|--------------------------|---------------|----------------|-----------------------|------------------------------------|------------------------------------------|-------------------------------------------------------------|----------------|---------------|-------------------------------------------------------------------------------------------------------------------------------------------------------------------------------------------------------------------------------------------------------------------------------------------------|---------------------------------------------------------------------------------------------------------------------------------------------------------------------------------------------------------------------------------------------------------------------------------|--------------------------------------------------------------------------------------------------------------------------------------------------------------------------------------------------------------------------------------------------|--|
| Document ID          | Database    | Title                                                                                                                                                                                                                                                                                                                                                                                                                                                                                                                                                                                                | Author(s)                                 | Date | Publication                       | Document Type | Open Access | Method Analysis                                   | Analytical Complexity | Interaction Analysis | Data Source Analysis                                                     | Factors                                                                                                                 | Method Application | Aspects of WASH          | Rural / Urban | Context        | Outcome Scope         | Project Application                | Location                                 | Location Region                                             | Location Count | Study Impacts | Time                                                                                                                                                                                                                                                                                            | Human Resources                                                                                                                                                                                                                                                                 | Cost                                                                                                                                                                                                                                             |  |
| 94                   | Hand Search | Technology Applicability Framework (TAF) - Research Report                                                                                                                                                                                                                                                                                                                                                                                                                                                                                                                                           | A. Olshewski and V. Casey                 | 2013 | Skat Foundation WaterAID          | Org           | X           | Framework                                         | Low                   | No                   | Primary Data<br>Secondary Data<br>Workshop<br>Interviews<br>Focus Groups | Financial<br>Social<br>Environmental<br>Institutional<br>Policy<br>Technical<br>Capacity<br>Education                   | Tool Approach      | Water Sanitation Hygiene | Rural Urban   | Regional       | Sustainability Access | Planning Implementation Evaluation | Burkina Faso<br>Ghana<br>Uganda          | East Africa<br>West Africa                                  | 3              | Uptake        | The TAF can be applied in a team of 2-3 persons per region. The TAF requires around 3 days of preparation and 3 days in the field.                                                                                                                                                              | Based on the experiences in three rounds of testing, it can be assumed that the application of the TAF requires around 3 days of preparation and 3 days in the field.                                                                                                           | The TAF is a cost efficient tool. The costs for applying the TAF are estimated around US\$ 3,000 per assessment of one technology in one district. A detailed breakdown of the costs for applying the TAF is presented in the Annex B of the TAF |  |
| 95                   | Hand Search | Adapting Life-Cycle Thinking Tools to Evaluate Project Sustainability in International Water and Sanitation Development Work                                                                                                                                                                                                                                                                                                                                                                                                                                                                         | J. McConville and J. Mihelcic             | 2007 | Environmental Engineering Science | Peer          | X           | Lifecycle Analysis<br>Composite Scoring Framework | Medium                | No                   | Observation<br>Survey<br>Primary Data                                    | Social<br>Cultural<br>Community<br>Political<br>Economic<br>Environmental                                               | Tool Framework     | Water Sanitation         | Rural         | Local          | Sustainability        | Planning Evaluation                | Zambougou-Fouta, Mali                    | West Africa                                                 | 1              |               |                                                                                                                                                                                                                                                                                                 |                                                                                                                                                                                                                                                                                 |                                                                                                                                                                                                                                                  |  |
| 96                   | Hand Search | Water and Sanitation Accountability Forum: Organizational Evaluation of COCEPRADIL                                                                                                                                                                                                                                                                                                                                                                                                                                                                                                                   | F. Rojas and C. Chatterley                | 2011 | Improve International             | Grey          | X           | Framework<br>Qualitative Data Analysis            | Medium                | No                   | Secondary Data<br>Focus Groups<br>Observation<br>Interviews<br>Surveys   | NGOs<br>Coordination<br>Services<br>Education<br>Hygiene<br>Technical<br>QM<br>Environmental<br>Community<br>Management | Framework Approach | Water Sanitation         | Rural         | Local          | Sustainability        | Evaluation Case Study              | Lempira, Honduras                        | Central America                                             | 1              |               | For this pilot Accountability Forum, a week was given for preparation meetings, data collection and wrap-up. Though a week is not a substantial amount of time for a field-based study, independent evaluators and Forum participants felt that this was sufficient time to respond to the main | Based on the pilot test it is estimated that ratings using the Water for Life framework will cost between US\$ 15,000-30,000 per evaluation and require one week of field data collection and three to five months lead including preparation and reporting. (Triple-S Summary) |                                                                                                                                                                                                                                                  |  |
| 97                   | Hand Search | Thousands of handpumps have been installed across sub-Saharan Africa over the past four decades to improve rural water supplies. However, multiple studies have raised concerns over the extent to which these sources are providing safe and adequate quantities of water post-construction. A number of factors could be causing these problems, either directly or indirectly. Understanding the interrelated nature of these factors and their inherent complexity is crucial if handpump failures are to be avoided in the future. This chapter demonstrates how some of this complexity can be | Elisabeth S. Liddle and Richard A. Fenner | 2019 | Systems Thinking in WASH          | Grey          |             | Causal Loop Diagrams                              | Medium                | Yes                  | Interviews<br>Expert Opinion                                             | Technical<br>QM<br>Capacity<br>Environmental<br>Services<br>Institutional<br>Financial<br>Coordination                  | Framework Tool     | Water                    | Rural         | Local          | Access Sustainability | Evaluation                         | Uganda                                   | East Africa                                                 | 1              |               |                                                                                                                                                                                                                                                                                                 |                                                                                                                                                                                                                                                                                 |                                                                                                                                                                                                                                                  |  |
| 98                   | Hand Search | WASH services are influenced by complex stakeholder interactions that need to be understood and potentially influenced in order to improve service quality and sustainability. Social network analysis provides an opportunity for mapping and rigorously interpreting these stakeholder interactions in order to develop and monitor strategic interventions. Studies using social network analysis can be scaled to fit the scope of any project, and the visual nature of social networks helps to make findings accessible to a wide range of stakeholders. This chapter presents                | Duncan McNicholl                          | 2019 | Systems Thinking in WASH          | Grey          |             | Social Network Analysis                           | High                  | Yes                  | Interviews                                                               | Coordination<br>Institutions<br>NGOs<br>Networks                                                                        | Tool               | Water Sanitation         | Rural Urban   | Local Regional | Coordination          | Planning Evaluating                | Ghana<br>Tajikistan<br>Bolivia<br>Uganda | East Africa<br>Central Asia<br>South America<br>West Africa | 4              |               |                                                                                                                                                                                                                                                                                                 |                                                                                                                                                                                                                                                                                 |                                                                                                                                                                                                                                                  |  |

| Document Information |             |                                                                                                                                                                                                                                                                                                                                                                                                                                                                                                                                                                                                                          |                                                                                                          |      |                                            |               |             | Method                                         |                       |                      |                                               |                                                                                         |                    | Scope                    |               |          |                        | Application                        |                                                                                                                                           |                                         |                |                          |                                                                                                                                                           | Resources       |      |  |
|----------------------|-------------|--------------------------------------------------------------------------------------------------------------------------------------------------------------------------------------------------------------------------------------------------------------------------------------------------------------------------------------------------------------------------------------------------------------------------------------------------------------------------------------------------------------------------------------------------------------------------------------------------------------------------|----------------------------------------------------------------------------------------------------------|------|--------------------------------------------|---------------|-------------|------------------------------------------------|-----------------------|----------------------|-----------------------------------------------|-----------------------------------------------------------------------------------------|--------------------|--------------------------|---------------|----------|------------------------|------------------------------------|-------------------------------------------------------------------------------------------------------------------------------------------|-----------------------------------------|----------------|--------------------------|-----------------------------------------------------------------------------------------------------------------------------------------------------------|-----------------|------|--|
| Document ID          | Database    | Title                                                                                                                                                                                                                                                                                                                                                                                                                                                                                                                                                                                                                    | Author(s)                                                                                                | Date | Publication                                | Document Type | Open Access | Method Analysis                                | Analytical Complexity | Interaction Analysis | Data Source Analysis                          | Factors                                                                                 | Method Application | Aspects of WASH          | Rural / Urban | Context  | Outcome Scope          | Project Application                | Location                                                                                                                                  | Location Region                         | Location Count | Study Impacts            | Time                                                                                                                                                      | Human Resources | Cost |  |
| 100                  | Hand Search | Contemporary approaches to monitoring and evaluation (M&E) rely on using static indicators to assess a system that is fundamentally in flux. This chapter will look at the challenges of current approaches and provide insights into how to restructure the way we measure our impact on whole systems, rather than just individual processes. This chapter will explain how to adopt a system view of your operating environment, how to map that system to understand its interconnectedness and inherent complexity, and then how to identify the true drivers of the system to allow for the creation of a range of | Chris Brown                                                                                              | 2019 | Systems Thinking in WASH                   | Grey          |             | Social Network Analysis Causal Loop Diagrams   | High                  | Yes                  | Secondary Data                                | Monitoring Governance Institutional Management OSM                                      | Tool Approach      | Water                    | Rural         | Regional | Sustainability         | Evaluating                         | Tanzania                                                                                                                                  | East Africa                             | 1              |                          |                                                                                                                                                           |                 |      |  |
| EBSCO AP 1           | EBSCO       | Towards sustainable water, sanitation and hygiene technology use in sub-Saharan Africa: the Learning Alliance approach.                                                                                                                                                                                                                                                                                                                                                                                                                                                                                                  | S. Taylor, S. Asimah, R. Buamah, K. Nyarko, S. Sekuma, Y. Coubaly, A. Wozzame, P. Jeffrey, H. Parker     | 2017 | Water Policy                               | Peer          | X           | Collective Action                              | High                  | No                   | Interviews                                    | Social Economic Environmental Institutional Technical Users                             | Approach           | WASH                     | Rural         |          | Access Sustainability  | Evaluation                         | Burkina Faso Ghana Uganda                                                                                                                 | East Africa West Africa                 | 3              |                          | 3 years                                                                                                                                                   |                 |      |  |
| EBSCO AP 1033        | EBSCO       | A new approach to nationwide sanitation planning for developing countries: Case study of Indonesia.                                                                                                                                                                                                                                                                                                                                                                                                                                                                                                                      | S. Kerstens, M. Spoiler, I. Leusbrock, G. Zeeman                                                         | 2016 | Science of the Total Environment           | Peer          |             | Framework GIS                                  | High                  | Yes                  | Secondary Data Expert Opinions                | Access Economic Financial Technical Infrastructure Policy                               | Tool Framework     | Sanitation               | Rural Urban   | National | Access                 | Planning                           | Indonesia                                                                                                                                 | Southeast Asia                          | 1              | Uptake                   |                                                                                                                                                           |                 |      |  |
| EBSCO AP 14          | EBSCO       | A novel planning approach for the water, sanitation and hygiene (WASH) sector: The use of object-oriented bayesian networks.                                                                                                                                                                                                                                                                                                                                                                                                                                                                                             | R. Gine-Garriga, D. Requejo, J. Molina, A. Perez-Foguet                                                  | 2018 | ScienceDirect                              | Peer          | X           | Bayesian Networks                              | High                  | Yes                  | Secondary Data Expert Opinion                 | Technical Capacity Financial Socioeconomic Access Functionality Coordination Management | Tool               | Water Sanitation Hygiene | Rural         | Regional | Sustainability         | Planning                           | 21 Rural districts in Kenya                                                                                                               | East Africa                             | 1              |                          |                                                                                                                                                           |                 |      |  |
| EBSCO AP 1619        | EBSCO       | Assessing poverty-alleviation outcomes of an enterprise-led approach to sanitation.                                                                                                                                                                                                                                                                                                                                                                                                                                                                                                                                      | T. London and H. Esper                                                                                   | 2014 | Annals of the New York Academy of Sciences | Peer          | X           | Framework Qualitative Data Analysis Case Study | High                  | No                   | Secondary Data Interviews Observations        | Access Community Networks Health Hygiene Economic                                       | Analysis           | Sanitation               | Urban         | City     | Health                 | Evaluation Case Study              | Nairobi, Kenya                                                                                                                            | East Africa                             | 1              |                          |                                                                                                                                                           |                 |      |  |
| EBSCO AP 165         | EBSCO       | A Holistic Concept to Design Optimal Water Supply Infrastructures for Informal Settlements Using Remote Sensing Data                                                                                                                                                                                                                                                                                                                                                                                                                                                                                                     | L. Rausch, J. Friesen, L. Altherr, M. Meck, P. Pelz                                                      | 2018 | Remote Sensing                             | Peer          | X           | Mathematical optimization Remote sensing       | High                  | Yes                  | Secondary data                                | Context Financial Technical                                                             | Tool               | Water                    | Urban         | Local    | Access                 | Planning                           | Two slum communities in Dhaka, Bangladesh, Dar es Salaam, Tanzania                                                                        | East Africa South Asia                  | 1              |                          |                                                                                                                                                           |                 |      |  |
| EBSCO AP 17          | EBSCO       | Drinking Water Supply, Sanitation, and Hygiene Promotion Interventions in Two Slum Communities in Central Uganda.                                                                                                                                                                                                                                                                                                                                                                                                                                                                                                        | D. Musoke, R. Ndejo, A. Halage, S. Kasasa, J. Ssempebwa, D. Carpenter                                    | 2018 | Journal of Environmental & Public Health   | Peer          | X           | Qualitative Data Analysis                      | Low                   | No                   | Survey Primary Data Focus Groups Observations | Community Hygiene Education Social Behavioral Technical Health Capacity                 | Analysis Approach  | Water Sanitation Hygiene | Urban         | City     | Access Behavior Change | Planning Implementation Evaluation | two urban slum communities in central Uganda; Kikulu zone in Kawempe division, Kampala district; and Kikooza zone in Mukono Municipality, | East Africa                             | 2              | Services Behavior Change | The three-year project, which was carried out between 2010 and 2013, had three phases: preparatory, implementation, on, and evaluation as described below |                 |      |  |
| EBSCO AP 228         | EBSCO       | Why Do Water and Sanitation Systems for the Poor Still Fail? Policy Analysis in Economically Advanced Developing Countries.                                                                                                                                                                                                                                                                                                                                                                                                                                                                                              | M. Starki, N. Brunner, T.A. Sternstrom                                                                   | 2013 | Environmental Science & Technology         | Peer          |             | Case Study Statistics                          | High                  | Yes                  | Primary Data Secondary Data                   | Context Technical O&M Hygiene Community Social Financial Governance NGOs                | Analysis           | Water Sanitation         | Rural Urban   | Local    | Sustainability         | Case Study                         | 60 case studies across Mexico South Africa India                                                                                          | Central America South Africa South Asia | 60             |                          |                                                                                                                                                           |                 |      |  |
| EBSCO AP 30          | EBSCO       | The role of community participation for sustainable integrated neglected tropical diseases and water, sanitation and hygiene intervention programs: A pilot project in Tanzania.                                                                                                                                                                                                                                                                                                                                                                                                                                         | S. Madon, M. Malecela, K. Mshoto, R. Donohue, G. Muhyazi, E. Michael                                     | 2018 | ScienceDirect                              | Peer          | X           | Qualitative Data Analysis Statistics           | High                  | Yes                  | Surveys Interviews Focus Groups               | Socioeconomic Demographic Education Governance Health Technical                         | Approach Framework | WASH                     | Rural         | Local    | Health                 | Planning Case Study                | Rufiji (as intervention district) and Mwanza (used as a control) in the Coast (Pwani) Region of Tanzania                                  | East Africa                             | 1              | Health                   |                                                                                                                                                           |                 |      |  |
| EBSCO AP 324         | EBSCO       | The social benefits of water and sanitation projects in Northern Colombia: Cost-Benefit Analysis, the Water Poverty Index and beyond.                                                                                                                                                                                                                                                                                                                                                                                                                                                                                    | D. Arzueta, A. Montoya                                                                                   | 2017 | Wiley                                      | Peer          |             | Cost-Benefit Analysis Composite Scoring        | Medium                | No                   | Surveys Interviews Secondary data             | Social Economic Environmental                                                           | Tool               | Water Sanitation         | Rural         | Regional | Access                 | Case Study                         | Municipality of Moravia, Department of Cordoba, in Northern Colombia                                                                      | South America                           | 1              |                          |                                                                                                                                                           |                 |      |  |
| EBSCO AP 3313        | EBSCO       | A framework for planning of sustainable water and sanitation systems in peri-urban areas.                                                                                                                                                                                                                                                                                                                                                                                                                                                                                                                                | R. Tornqvist, A. Norstrom, E. Karman, P.A. Malmqvist                                                     | 2008 | Water Science & Technology                 | Peer          |             | Framework                                      | Medium                | No                   | Primary Data                                  | Health Environmental Economic Technical Social Cultural NGOs Access                     | Approach           | Water Sanitation         |               | City     | Sustainability         | Planning                           |                                                                                                                                           |                                         |                |                          |                                                                                                                                                           |                 |      |  |
| EBSCO AP 41          | EBSCO       | Exploring a New Regionalism-Based Approach to Managing Drinking Water Systems in Rural Regions.                                                                                                                                                                                                                                                                                                                                                                                                                                                                                                                          | S.P. Breen                                                                                               | 2018 | Society & Natural Resources                | Peer          |             | Framework                                      | Medium                | Yes                  | Interviews Secondary Data                     | Governance Policy Environmental Economic Social                                         | Approach           | Water                    | Rural         | Regional | Sustainability         | Case Study                         | Kootenay, British Columbia, Canada                                                                                                        | North America                           | 1              |                          |                                                                                                                                                           |                 |      |  |
| EBSCO AP 414         | EBSCO       | Designing a handwashing station for infrastructure-restricted communities in Bangladesh using the integrated behavioural model for water, sanitation and hygiene interventions (BM-WASH)                                                                                                                                                                                                                                                                                                                                                                                                                                 | K. Hullah, E. Leoncini, R. Dreibebe, L. Unicom, A. Alroz, N. Datta, D. Nizame, S. Luby, P. Ram, R. Winch | 2013 | BMC Public Health                          | Peer          | X           | Behavioral Model Qualitative Coding            | Medium                | No                   | Interviews                                    | Context Behavioral Technical                                                            | Framework Tool     | Hygiene                  | Rural Urban   | Local    | Access                 | Planning Evaluation                | Mohammadpur (Urban) and Kishoreganj (Rural), Bangladesh                                                                                   | South Asia                              | 2              |                          |                                                                                                                                                           |                 |      |  |

|                 |       |                                                                                                                             |         |      |              |      |  |                   |        |    |                              |                                                              |                       |                     |       |          |        |            |                                                            |             |   |  |  |  |  |
|-----------------|-------|-----------------------------------------------------------------------------------------------------------------------------|---------|------|--------------|------|--|-------------------|--------|----|------------------------------|--------------------------------------------------------------|-----------------------|---------------------|-------|----------|--------|------------|------------------------------------------------------------|-------------|---|--|--|--|--|
| EBSCO AP<br>428 | EBSCO | Inclusive water poverty<br>index: a holistic<br>approach for helping<br>local water and<br>sanitation services<br>planning. | J. Kiri | 2017 | Water Policy | Peer |  | Composite Scoring | Medium | No | Secondary Data<br>Interviews | Environmental<br>Access<br>Management<br>Social<br>Financial | Framework<br>Approach | Water<br>Sanitation | Rural | Regional | Access | Case Study | Niabouri, Sily and To<br>municipalities in<br>Burkina Faso | West Africa | 3 |  |  |  |  |
|-----------------|-------|-----------------------------------------------------------------------------------------------------------------------------|---------|------|--------------|------|--|-------------------|--------|----|------------------------------|--------------------------------------------------------------|-----------------------|---------------------|-------|----------|--------|------------|------------------------------------------------------------|-------------|---|--|--|--|--|

| Document Information |          |                                                                                                                                  |                                                                                |      |                                                                |               |             | Method                                                         |                       |                      |                                                       |                                                                                                                                                                                     | Scope              |                 |               |                   |                             | Application           |                                                                                                                                                                                                        |                                      |                |                     | Resources |                 |      |
|----------------------|----------|----------------------------------------------------------------------------------------------------------------------------------|--------------------------------------------------------------------------------|------|----------------------------------------------------------------|---------------|-------------|----------------------------------------------------------------|-----------------------|----------------------|-------------------------------------------------------|-------------------------------------------------------------------------------------------------------------------------------------------------------------------------------------|--------------------|-----------------|---------------|-------------------|-----------------------------|-----------------------|--------------------------------------------------------------------------------------------------------------------------------------------------------------------------------------------------------|--------------------------------------|----------------|---------------------|-----------|-----------------|------|
| Document ID          | Database | Title                                                                                                                            | Author(s)                                                                      | Date | Publication                                                    | Document Type | Open Access | Method Analysis                                                | Analytical Complexity | Interaction Analysis | Data Source Analysis                                  | Factors                                                                                                                                                                             | Method Application | Aspects of WASH | Rural / Urban | Context           | Outcome Scope               | Project Application   | Location                                                                                                                                                                                               | Location Region                      | Location Count | Study Impacts       | Time      | Human Resources | Cost |
| EBSCO AP 508         | EBSCO    | A decision support model to aid the management of crises in urban water supply systems (the UWC-MODEL)                           | W. Da Silva, M. Souza                                                          | 2017 | Urban Water Journal                                            | Peer          |             | Framework                                                      | High                  | Yes                  | Secondary Data                                        | Demographic Technical Policy Governance Financial Context Climate Socioeconomic                                                                                                     | Framework          | Water           | Urban         | Regional          | Sustainability              | Case Study            | Administrative Region of Brasilia, Brazil                                                                                                                                                              | South America                        | 1              |                     |           |                 |      |
| EBSCO AP 511         | EBSCO    | Harnessing the plurality of actor frames in social-ecological systems: ecological sanitation in Bolivia                          | M. Eelderink, J. Vervoort, D. Snel, F.D. Castro                                | 2017 | Development in Practice                                        | Peer          | X           | Statistics                                                     | High                  | No                   | Interviews Primary Data Observation                   | Health Environmental Economic O&M Social                                                                                                                                            | Framework          | Sanitation      | Rural         | Local             | Access                      | Evaluation            | San Pedro, Bolivia                                                                                                                                                                                     | South America                        | 1              |                     |           |                 |      |
| EBSCO AP 774         | EBSCO    | Sustainable community-based drinking water systems in developing countries: stakeholder perspectives                             | M. Aslam, M. Adil, S. Mirza, D.Frigon                                          | 2016 | Journal of Water Supply: Research and Technology               | Peer          |             | AHP                                                            | High                  | No                   | Surveys                                               | Technical Environmental Economic Social Institutional                                                                                                                               | Analysis           | Water           | Urban         | Local             | Coordination                | Case Study            | Peshawar, Pakistan                                                                                                                                                                                     | South Asia                           | 1              |                     |           |                 |      |
| IRC 1070             | IRC      | Multiple-use water supply systems: do the claims stack up? Evidence from Bangladesh                                              | M. Fontein, J. Webster, P. Travisik                                            | 2010 | Waterlines                                                     | Peer          |             | Framework                                                      | Low                   | No                   | Interviews Observations Secondary Data                | Functionality Financial Institutional O&M Management Capacity                                                                                                                       | Framework          | Water           | Rural         | Local             | Access Sustainability       | Case Study Evaluation | Bashubehar, Magbari and Chandakona, Bogra, north-west Bangladesh                                                                                                                                       | South Asia                           | 3              | Services Users      |           |                 |      |
| IRC 1073             | IRC      | Between rural and urban: towards sustainable management of water supply systems in small towns in Africa                         | P. Moriarty, T. Patrick, T.F. Bassemiejer, J. Smet, C. Voorden                 | 2002 | IRC WASH                                                       | Org           | X           | Case Study                                                     | Medium                | Yes                  | Secondary Data                                        | Context Technical Community Management Governance Institutional Monitoring Regulations O&M Financial Private Sector Political Capacity Policy Donors Environmental Hygiene Planning | Analysis           | Water           | Rural Urban   | City              | Access Sustainability       | Case Study            | Tanzania Sudan Ghana Senegal Benin                                                                                                                                                                     | West Africa East Africa North Africa | 5              |                     |           |                 |      |
| IRC 1075             | IRC      | Assessing the "Plus" of successful community-managed water supply programs in India                                              | M. Snehathatha, S. Smith, S. Jasti, P. Hutchings,R. Poonia, C. Daniel, C. Dash | 2015 | Australian AID: Department of Foreign Affairs and Trade (DFAT) | Grey          | X           | Qualitative Data Analysis                                      | High                  | No                   | Secondary Data Interviews Focus Groups Surveys        | Management Capacity Coordination Cultural Economic Donors Financial Governance Technical Implementation Monitoring Planning Political Private Sector Services Regulations           | Analysis           | Water           | Rural         | Local             | Sustainability              | Case Study            | 20 communities in India                                                                                                                                                                                | South Asia                           | 20             |                     |           |                 |      |
| IRC 1077             | IRC      | Norms and attitudes towards ecosan and other sanitation systems: desk study by a group of experts on ecological sanitation       | J.-O. Drangert                                                                 | 2004 | EcoSanRes Stockholm Environment Institute                      | Grey          | X           | Qualitative Data Analysis                                      | High                  | No                   | Expert Opinion Secondary Data Observations Interviews | Technical Regulations Economic Health Cultural Social Behavioral Management O&M Networks                                                                                            | Analysis           | Sanitation      | Urban         | City              | Behavior Change             | Case Study            | Addis Ababa, Ethiopia Cuernavaca, Mexico Kisumu, Kenya Dar es Salaam, Tanzania Kabale, Uganda                                                                                                          | East Africa Central America          | 5              |                     |           |                 |      |
| IRC 1089             | IRC      | Assessing sustainability of community management of rural water systems in the developing world                                  | R. Schweitzer, J. Mihelcic                                                     | 2012 | Journal of Water, Sanitation and Hygiene for Development       | Peer          |             | Composite Scoring Statistics                                   | High                  | No                   | Primary Data Interviews                               | Community Users Governance Financial O&M Functionality                                                                                                                              | Tool               | Water           | Rural         | Local             | Sustainability              | Evaluation            | Dominican Republic                                                                                                                                                                                     | Caribbean                            | 1              |                     |           |                 |      |
| IRC 1122             | IRC      | Open planning of sanitation systems                                                                                              | R. Kvarnström, E. Petersens                                                    | 2004 | EcoSanRes Stockholm Environment Institute                      | Grey          | X           | Multi-Criteria Decision Analysis                               | Low                   | No                   | Expert Opinion Secondary Data Focus Groups            | Networks Hygiene Environmental Financial Management Technical Social Cultural Institutional O&M Monitoring Policy                                                                   | Framework Approach | Sanitation      | Rural Urban   | Local             | Sustainability              | Planning              | Vadstbo, Sweden                                                                                                                                                                                        | North Europe                         | 1              |                     |           |                 |      |
| IRC 1201             | IRC      | Research into financial and institutional structures to support the functionality and sustainability of rural hill water systems | N.P. Kathmandu                                                                 | 2010 | WaterAID                                                       | Org           | X           | Qualitative Data Analysis                                      | Medium                | No                   | Interviews Secondary Data Observations                | O&M Social Environmental Financial Functionality Capacity Institutional Monitoring Community Governance                                                                             | Analysis           | Water           | Rural         | Local             | Sustainability              | Evaluation            | 19 villages in 5 districts in Nepal Sankhuwa, Saba, Dhading, Baglung, Kaski                                                                                                                            | South Asia                           | 19             |                     |           |                 |      |
| IRC 122              | IRC      | Learning alliance approach: final report                                                                                         | J. Nium                                                                        | 2014 | IRC WASH                                                       | Org           | X           | Learning Alliances Qualitative Data Analysis Collective Action | Medium                | No                   | Secondary Data Interviews Focus Groups                | Capacity Coordination Financial Governance Implementation Policy Networks NGOs Participation Policy Political                                                                       | Approach           | Water           | Rural         | Regional National | Coordination Sustainability | Evaluation            | Four pilot regions in Ghana: Northern, Brong Ahafo and Volta Three pilot districts in Ghana: Gomoa East in the Northern region; Sunyani West in the Brong Ahafo region; and Akatsi in the Volta region | West Africa                          | 7              | Coordination Policy |           |                 |      |
| IRC 1266             | IRC      | Governance, sustainability and decision making in water and sanitation management systems                                        | M.A. Iribamagaray, L. Seghezzo                                                 | 2012 | Sustainability                                                 | Peer          | X           | Composite Scoring                                              | Medium                | No                   | Secondary Data Interviews Observations                | Economic Coordination Regulations Participation Implementation Capacity Institutional Behavioral Social Cultural Governance                                                         | Tool               | Water           | Urban         | City              | Sustainability              | Evaluation            | Salta, Argentina                                                                                                                                                                                       | South America                        | 1              |                     |           |                 |      |

| Document Information |          |                                                                                                                                           |                                                                                                                       |      |                                                        |               |             | Method                                                    |                       |                      |                                                       |                                                                                                                                                                                                                                        | Scope              |                             |                |                                         | Application                                 |                            |                                                                                                                           |                                                                              |                | Resources                                                    |                                                                                                                                                                                                                                                                                             |                                                                                                                                                                                                                                                                                          |      |
|----------------------|----------|-------------------------------------------------------------------------------------------------------------------------------------------|-----------------------------------------------------------------------------------------------------------------------|------|--------------------------------------------------------|---------------|-------------|-----------------------------------------------------------|-----------------------|----------------------|-------------------------------------------------------|----------------------------------------------------------------------------------------------------------------------------------------------------------------------------------------------------------------------------------------|--------------------|-----------------------------|----------------|-----------------------------------------|---------------------------------------------|----------------------------|---------------------------------------------------------------------------------------------------------------------------|------------------------------------------------------------------------------|----------------|--------------------------------------------------------------|---------------------------------------------------------------------------------------------------------------------------------------------------------------------------------------------------------------------------------------------------------------------------------------------|------------------------------------------------------------------------------------------------------------------------------------------------------------------------------------------------------------------------------------------------------------------------------------------|------|
| Document ID          | Database | Title                                                                                                                                     | Author(s)                                                                                                             | Date | Publication                                            | Document Type | Open Access | Method Analysis                                           | Analytical Complexity | Interaction Analysis | Data Source Analysis                                  | Factors                                                                                                                                                                                                                                | Method Application | Aspects of WASH             | Rural / Urban  | Context                                 | Outcome Scope                               | Project Application        | Location                                                                                                                  | Location Region                                                              | Location Count | Study Impacts                                                | Time                                                                                                                                                                                                                                                                                        | Human Resources                                                                                                                                                                                                                                                                          | Cost |
| IRC 133              | IRC      | Scaling up innovations through learning alliances : an introduction to the approach                                                       | S. Smits, P. Moriarty, C. Fonseca, T. Schouten                                                                        | 2007 | IRC WASH                                               | Org           | X           | Learning Alliances Collective Action                      | Medium                | Yes                  | Primary Data<br>Secondary Data<br>Expert Opinion      | Capacity<br>Context<br>Coordination<br>Cultural<br>Financial<br>Governance<br>Implementation<br>Institutional<br>Monitoring<br>Networks<br>Participation<br>Planning<br>Policy<br>Political                                            | Approach           | WASH                        | Rural<br>Urban | Local<br>Regional<br>National<br>Sector | Coordination<br>Sustainability              | Implementation             | Coli, Columbia<br>Egypt<br>Palestine<br>Jordan<br>South Africa                                                            | South America<br>Middle East<br>South Africa                                 | 5              | Uptake<br>Coordination<br>Policy                             | Longer start-up period is needed: one year rather than the usual 3-6 months. This implies a need for advocacy to find funding for more enlightened approaches than conventional linear projects, and to take into account the quality of processes rather than purely quantitative outputs. | Team of 3 full time staff plus partner supported coordinators in two countries. Teams of 2 persons per region dedicating about 25% of their time to process facilitation. 1 full time equivalent per country for process facilitation in addition to specialists and project management. |      |
| IRC 152              | IRC      | Explaining the inter village variations in drinking water provision: factors influencing costs and service levels in rural Andhra Pradesh | R. Reddy                                                                                                              | 2012 | IRC WASH                                               | Org           | X           | Statistics                                                | High                  | Yes                  | Secondary Data                                        | Demographic<br>Social<br>Economic<br>Technical<br>Environmental<br>Climate<br>Institutional<br>Participation<br>Governance<br>Planning<br>Financial<br>Capacity                                                                        | Analysis           | Water                       | Rural          | Local                                   | Sustainability                              | Case Study                 | India<br>Ghana<br>Mozambique<br>Burkina Faso                                                                              | South Asia<br>East Africa<br>West Africa                                     | 4              |                                                              |                                                                                                                                                                                                                                                                                             |                                                                                                                                                                                                                                                                                          |      |
| IRC 153              | IRC      | ONEWASH Plus Sustainability Checks First Annual Report                                                                                    | M. Adank, E. Defere, J. Butterworth                                                                                   | 2015 | IRC WASH                                               | Org           | X           | Composite Scoring                                         | Medium                | No                   | Primary Data<br>Surveys                               | Functionality<br>Services<br>Institutional<br>Financial<br>Environmental<br>Social<br>Infrastructure<br>Management<br>Capacity<br>Monitoring<br>O&M<br>Policy<br>Participation<br>Economic<br>Hygiene<br>Institutional                 | Tool               | Water<br>Sanitation<br>WASH | Urban<br>Rural | Local                                   | Sustainability                              | Evaluation<br>Planning     | Project Towns in Ethiopia<br>Makengeli<br>Abomsa<br>Sheno<br>Wetenchli<br>Adshihu<br>Wukro                                | East Africa                                                                  | 6              |                                                              |                                                                                                                                                                                                                                                                                             |                                                                                                                                                                                                                                                                                          |      |
| IRC 175              | IRC      | Making cities open defecation free : a systematic approach in Maharashtra                                                                 | Department, Maharashtra (State)<br>Urban Development, University, CEPT, Self-Government, All India Institute of Local | 2016 | Government of Maharashtra, India                       | Grey          | X           | Framework                                                 | Low                   | No                   | Surveys<br>Observations<br>Focus Groups               | Access<br>Behavioral<br>Capacity<br>Community<br>Context<br>Coordination<br>Education<br>Financial<br>Health<br>Hygiene<br>Implementation<br>Management<br>NGOs<br>O&M<br>Participation<br>Planning<br>Political<br>Services<br>Social | Approach           | Sanitation<br>Hygiene       | Urban          | Local<br>City                           | Behavior Change<br>Access<br>Sustainability | Planning<br>Implementation | 19 cities, 51 councils and 1 corporation in Maharashtra District, India                                                   | South Asia                                                                   | 1              | Behavior Change<br>Uptake<br>Services<br>Financial<br>Policy |                                                                                                                                                                                                                                                                                             |                                                                                                                                                                                                                                                                                          |      |
| IRC 253              | IRC      | Multiple-use services as an alternative to rural water supply services : a characterisation of the approach                               | S. Smits, B. van Koppen, P. Moriarty, J. Butterworth                                                                  | 2010 | Water Alternatives                                     | Peer          | X           | Framework<br>Case Study                                   | Medium                | No                   | Surveys<br>Interviews<br>Observations<br>Focus Groups | Technical<br>Institutional<br>Financial<br>Environmental                                                                                                                                                                               | Analysis           | Water                       | Rural          | Local                                   | Access<br>Sustainability                    | Case Study                 | 30 villages across 8 countries: Bolivia<br>Colombia<br>Ethiopia<br>India<br>Nepal<br>South Africa<br>Thailand<br>Zimbabwe | South America<br>East Africa<br>South Africa<br>South Asia<br>Southeast Asia | 8              |                                                              |                                                                                                                                                                                                                                                                                             |                                                                                                                                                                                                                                                                                          |      |
| IRC 278              | IRC      | A livelihood approach to water interventions in rural areas and implications for Multiple Use Systems                                     | J.M. Faurès, G. Santini, A.N. Villemarcou                                                                             | 2008 | International Symposium of Multiple-Use Water Services | Peer          | X           | Framework                                                 | Low                   | No                   | Secondary Data                                        | Access<br>Agriculture<br>Context<br>Economic<br>Climate<br>Technical                                                                                                                                                                   | Framework          | Water                       | Rural          | Local                                   | Access                                      | Framework                  | Sub-Saharan Africa                                                                                                        | East Africa<br>West Africa<br>Middle Africa<br>South Africa                  | 4              |                                                              |                                                                                                                                                                                                                                                                                             |                                                                                                                                                                                                                                                                                          |      |
| IRC 330              | IRC      | A service delivery approach for rural water supply in Timor-Leste : institutional options and strategy                                    | J. Willets                                                                                                            | 2012 | University of Technology Sydney                        | Grey          | X           | Framework<br>Building Blocks<br>Qualitative Data Analysis | High                  | No                   | Secondary Data<br>Interviews                          | Community<br>Services<br>Capacity<br>Monitoring<br>Policy<br>Technical<br>Regulations<br>Education<br>Infrastructure<br>Financial<br>Governance                                                                                        | Framework          | Water                       | Rural          | Local                                   | Sustainability                              | Framework                  | Timor-Leste                                                                                                               | Southeast Asia                                                               | 1              |                                                              |                                                                                                                                                                                                                                                                                             |                                                                                                                                                                                                                                                                                          |      |

[illegible]

| Document Information |          |                                                                                                                                                         |                                                                         |      |                                                                                                                                                                                                                            |               |             | Method                                               |                       |                      |                                                                 |                                                                                                                                                                  | Scope              |                          |               |                | Application                    |                     |                                                                                                                    |                                                             |                |                 | Resources                                                                                                                                                                                             |                 |      |
|----------------------|----------|---------------------------------------------------------------------------------------------------------------------------------------------------------|-------------------------------------------------------------------------|------|----------------------------------------------------------------------------------------------------------------------------------------------------------------------------------------------------------------------------|---------------|-------------|------------------------------------------------------|-----------------------|----------------------|-----------------------------------------------------------------|------------------------------------------------------------------------------------------------------------------------------------------------------------------|--------------------|--------------------------|---------------|----------------|--------------------------------|---------------------|--------------------------------------------------------------------------------------------------------------------|-------------------------------------------------------------|----------------|-----------------|-------------------------------------------------------------------------------------------------------------------------------------------------------------------------------------------------------|-----------------|------|
| Document ID          | Database | Title                                                                                                                                                   | Author(s)                                                               | Date | Publication                                                                                                                                                                                                                | Document Type | Open Access | Method Analysis                                      | Analytical Complexity | Interaction Analysis | Data Source Analysis                                            | Technical Factors                                                                                                                                                | Method Application | Aspects of WASH          | Rural / Urban | Context        | Outcome Scope                  | Project Application | Location                                                                                                           | Location Region                                             | Location Count | Study Impacts   | Time                                                                                                                                                                                                  | Human Resources | Cost |
| IRC 356              | IRC      | A life-cycle approach to improve the sustainability of rural water systems in resource-limited countries                                                | S.A. Jones, A. Anya, N. Stace, L. Weir                                  | 2012 | Challenges                                                                                                                                                                                                                 | Peer          | X           | Lifecycle Analysis Framework Decision Trees          | Medium                | No                   | Secondary Data                                                  | Technical Environmental Institutional Community Management Users Financial Health                                                                                | Framework Approach | Water                    | Rural         | Local          | Sustainability                 | Planning            | Jhumka, Indrapur, and Panchakanya in Nepal                                                                         | South Asia                                                  | 3              |                 |                                                                                                                                                                                                       |                 |      |
| IRC 362              | IRC      | Integrate at the top, involve at the bottom – the household-centred approach to environmental sanitation                                                | C. Lüthi, A. Morel, E. Tilley                                           | 2008 | IRC WASH                                                                                                                                                                                                                   | Peer          | X           | Framework                                            | Medium                | No                   | Expert Opinion Workshop                                         | Technical Users Social Financial Institutional Access Governance                                                                                                 | Approach           | Sanitation               | Urban         | Local          | Access                         | Evaluation          | Costa Rica<br>Burkina Faso<br>Kenya<br>Tanzania<br>Laos<br>Nepal                                                   | Central America<br>West Africa<br>East Africa<br>South Asia | 6              | Uptake          | A one-day interactive community workshop ensures that the communities' views and knowledge is recognised and forms a valuable input to the assessment report that follows in the third planning step. |                 |      |
| IRC 364              | IRC      | The effectiveness and sustainability of two demand-driven sanitation and hygiene approaches in Zimbabwe                                                 | L. Whaley, J. Webster                                                   | 2011 | Journal of Water, Sanitation and Hygiene for Development                                                                                                                                                                   | Peer          |             | Case Study Qualitative Data Analysis                 | Medium                | No                   | Surveys Interviews Focus Groups                                 | Demographic Economic Cultural Social Community Health Hygiene Financial Climate Infrastructure NGOs                                                              | Analysis           | Sanitation Hygiene       | Rural         | Local          | Behavior Change Sustainability | Evaluation          | The study was carried out in three districts of Zimbabwe: Chiredzi district, Chipinge district and Mutoko district | East Africa                                                 | 3              | Behavior Change |                                                                                                                                                                                                       |                 |      |
| IRC 372              | IRC      | A life-cycle capacity-based approach to allocating investments in municipal sanitation infrastructure                                                   | G.E. Louis, L. Magpili                                                  | 2007 | Structure and Infrastructure Engineering                                                                                                                                                                                   | Peer          |             | Composite Scoring                                    | High                  | No                   | Secondary Data                                                  | Services Institutional Capacity Technical Economic Financial Energy Environmental Social Cultural                                                                | Tool               | Sanitation               | Urban         | Local          | Sustainability                 | Case Study          | Manila, Philippines<br>Mombasa, Kenya                                                                              | East Africa<br>Southeast Asia                               | 2              |                 |                                                                                                                                                                                                       |                 |      |
| IRC 373              | IRC      | From beneficiaries to businesses to the big picture: Monitoring for sustainability in market-based approaches to sanitation                             | D. Sparkman                                                             | 2013 | IRC, Water For People                                                                                                                                                                                                      | Grey          | X           | Composite scoring                                    | Low                   | No                   | Interviews Observations Surveys                                 | Access Services Private Sector Community NGOs Infrastructure Financial Regulations Political                                                                     | Tool               | Sanitation               | Rural Urban   | Local Regional | Sustainability                 | Case Study          | Blantyre, Malawi                                                                                                   | East Africa                                                 | 1              |                 |                                                                                                                                                                                                       |                 |      |
| IRC 478              | IRC      | Flores revisited : sustainability, hygiene and use of community-managed water supply and sanitation and the relationships with project approaches an... | C. Sijbesma, K. Sari, N. Shatfin, R. Watugala, I. Mukherjee, R. Hopkins | 2002 | WSP-EAP, IRC WASH                                                                                                                                                                                                          | Grey          | X           | Method for Participatory Assessment (MPA) Statistics | High                  | Yes                  | Focus Groups Workshops Primary Data Secondary Data Observations | Social Economic Health Technical Environmental Community Financial Management Access Hygiene Behavioral Institutional Participation Gender                       | Analysis           | Water Sanitation Hygiene | Rural         | Local          | Sustainability                 | Evaluation          | 63 Communities in Flores, NTT, Indonesia                                                                           | Oceania                                                     | 1              |                 |                                                                                                                                                                                                       |                 |      |
| IRC 539              | IRC      | Sanitation 21 : simple approaches to complex sanitation : a draft framework for analysis                                                                | J. Parkinson, C. Lüthi, D. Walther                                      | 2006 | The International Water Association (IWA)<br>The Swiss Federal Institute of Aquatic Science and Technology (Eawag)<br>The Deutsche Gesellschaft für Internationale Zusammenarbeit (GIZ)<br>Sustainable Sanitation Alliance | Grey          | X           | Framework                                            | Low                   | No                   | Secondary Data Primary Data Surveys Focus Groups                | Planning NGOs Networks Institutional Private Sector Policy Regulations O&M Infrastructure Technical Financial Services Social Monitoring Implementation Capacity | Framework          | Sanitation               | Urban         | City           | Sustainability                 | Planning            |                                                                                                                    |                                                             |                |                 |                                                                                                                                                                                                       |                 |      |
| IRC 575              | IRC      | External factors influencing the sustainability of micro and small piped water enterprises in Kenya's peri-urban areas                                  | E. Mukulu, L. Oyugi, S. Mwanjia                                         | 2011 | International Journal of Humanities and Social Science                                                                                                                                                                     | Peer          | X           | Qualitative data analysis Statistics                 | High                  | No                   | Surveys Interviews Observations                                 | Social Political Regulations Economic Private Sector                                                                                                             | Analysis           | Water                    | Urban         | City           | Sustainability                 | Case Study          | Nairobi, Mombasa and Kisumu, Kenya                                                                                 | East Africa                                                 | 3              |                 |                                                                                                                                                                                                       |                 |      |
| IRC 601              | IRC      | Factors influencing knowledge and practice of hygiene in Water, Sanitation and Hygiene (WASH) programme areas of Bangladesh Rural Advancement Committee | T. Akter, A. Mehrab                                                     | 2014 | Rural and Remote Health                                                                                                                                                                                                    | Peer          | X           | Qualitative data analysis                            | Medium                | No                   | Interviews Observation                                          | Hygiene Users Behavioral Financial Environmental Social Education Participation Demographic Services                                                             | Analysis           | Sanitation Hygiene       | Rural         | Local          | Behavior Change                | Case Study          | 12 Villages across six upazilas in BRAC programs in Bangladesh                                                     | South Asia                                                  | 6              |                 |                                                                                                                                                                                                       |                 |      |
| IRC 63               | IRC      | Promoting harmonized monitoring for the WASH sector: the Rural Water and Sanitation Information System SIASAR as an example                             | A. Rodriguez Serrano                                                    | 2018 | IRC WASH, World Bank                                                                                                                                                                                                       | Grey          | X           | SIASAR Composite Scoring                             | Medium                | No                   | Survey                                                          | Infrastructure Technical Financial O&M Services Access Demographic Health Hygiene Capacity                                                                       | Tool               | Water                    | Rural         | Local          | Sustainability                 | Evaluation          | Mexico<br>Dominican Republic<br>Costa Rica<br>Nicaragua<br>Panama<br>Peru<br>Brazil                                | Central America<br>South America<br>Caribbean               | 3              | Uptake          |                                                                                                                                                                                                       |                 |      |

|         |     |                                                                                                                 |                                                       |      |                        |      |   |                                         |      |    |                                              |                                                                                                                                               |            |       |       |      |                |            |                                                                                  |                              |   |  |  |  |  |
|---------|-----|-----------------------------------------------------------------------------------------------------------------|-------------------------------------------------------|------|------------------------|------|---|-----------------------------------------|------|----|----------------------------------------------|-----------------------------------------------------------------------------------------------------------------------------------------------|------------|-------|-------|------|----------------|------------|----------------------------------------------------------------------------------|------------------------------|---|--|--|--|--|
| IRC 636 | IRC | Sustainable replication and scaling up of small piped water networks : technical assistance consultant's report | University of Tokyo Civil Engineering-Tokyo, JP, UTCE | 2008 | Asian Development Bank | Grey | X | Case Study<br>Qualitative Data Analysis | High | No | Interviews<br>Observations<br>Secondary Data | Context<br>NGOs<br>Institutional Capacity<br>Financial<br>Regulations<br>Monitoring<br>O&M<br>Management<br>Private Sector<br>Social Services | Case Study | Water | Urban | City | Sustainability | Case Study | Four utilities in Manila, Philippines (2); Ahmedabad, India; Tien Giang, Vietnam | South Asia<br>Southeast Asia | 4 |  |  |  |  |
|---------|-----|-----------------------------------------------------------------------------------------------------------------|-------------------------------------------------------|------|------------------------|------|---|-----------------------------------------|------|----|----------------------------------------------|-----------------------------------------------------------------------------------------------------------------------------------------------|------------|-------|-------|------|----------------|------------|----------------------------------------------------------------------------------|------------------------------|---|--|--|--|--|

| Document Information |          |                                                                                                                    |                                                                                     |      |                                                 |               |             | Method                                                 |                       |                      |                                               |                                                                                                                                     |                    | Scope            |               |                                |                | Application             |                                                                                         |                                                      |                |                     | Resources                                                                                                                                                                                                                                                                                       |                                                                                                                                                                                                                                                                                                          |                                                                                                     |
|----------------------|----------|--------------------------------------------------------------------------------------------------------------------|-------------------------------------------------------------------------------------|------|-------------------------------------------------|---------------|-------------|--------------------------------------------------------|-----------------------|----------------------|-----------------------------------------------|-------------------------------------------------------------------------------------------------------------------------------------|--------------------|------------------|---------------|--------------------------------|----------------|-------------------------|-----------------------------------------------------------------------------------------|------------------------------------------------------|----------------|---------------------|-------------------------------------------------------------------------------------------------------------------------------------------------------------------------------------------------------------------------------------------------------------------------------------------------|----------------------------------------------------------------------------------------------------------------------------------------------------------------------------------------------------------------------------------------------------------------------------------------------------------|-----------------------------------------------------------------------------------------------------|
| Document ID          | Database | Title                                                                                                              | Author(s)                                                                           | Date | Publication                                     | Document Type | Open Access | Method Analysis                                        | Analytical Complexity | Interaction Analysis | Data Source Analysis                          | Factors                                                                                                                             | Method Application | Aspects of WASH  | Rural / Urban | Context                        | Outcome Scope  | Project Application     | Location                                                                                | Location Region                                      | Location Count | Study Impacts       | Time                                                                                                                                                                                                                                                                                            | Human Resources                                                                                                                                                                                                                                                                                          | Cost                                                                                                |
| IRC 637              | IRC      | Factors influencing water system functionality in Nigeria and Tanzania: a regression and Bayesian network analysis | R. Cronk, J. Bartram                                                                | 2017 | Environmental Science & Technology              | Peer          |             | Statistics                                             | High                  | Yes                  | Secondary Data                                | Environmental Financial Functionality Agriculture Management Technical Context                                                      | Analysis           | Water            | Rural Urban   | Local City                     | Sustainability | Evaluation              | 82,503 systems in Tanzania and Nigeria                                                  | East Africa West Africa                              | 2              |                     |                                                                                                                                                                                                                                                                                                 |                                                                                                                                                                                                                                                                                                          |                                                                                                     |
| IRC 70               | IRC      | Organizing framework for functional national WASH monitoring and evaluation systems                                | UNICEF, IRC, Akvo                                                                   | 2016 | UNICEF, IRC WASH, Akvo                          | Grey          | X           | Framework                                              | Low                   | No                   |                                               | Institutional Capacity Coordination Financial Implementation Monitoring                                                             | Framework Tool     | WASH             | Rural Urban   | National                       | Sustainability | Evaluation              |                                                                                         |                                                      |                |                     |                                                                                                                                                                                                                                                                                                 |                                                                                                                                                                                                                                                                                                          |                                                                                                     |
| IRC 879              | IRC      | Sustainable community water - managing supply systems in the mid-hills of Nepal                                    | B.S. Bhandari                                                                       | 2005 | Water Policy                                    | Peer          |             | Qualitative data analysis Statistics Composite Scoring | High                  | No                   | Surveys Observation Focus Groups              | NGOs Users Management Participation Community Access Services Gender                                                                | Analysis           | Water            | Rural         | Local                          | Sustainability | Evaluation              | Baglung and Kavre, Nepal                                                                | South Asia                                           | 1              |                     |                                                                                                                                                                                                                                                                                                 |                                                                                                                                                                                                                                                                                                          |                                                                                                     |
| IRC 912              | IRC      | Looking back to move forward in strength - monitoring of water system sustainability                               | K. Fogelberg                                                                        | 2009 | Knowledge Management for Development Journal    | Peer          | X           | Composite Scoring                                      | Low                   | No                   | Interviews Observation Primary Data           | Access Management Financial OSM Users Hygiene Environmental                                                                         | Tool               | Water            | Rural Urban   | Regional                       | Sustainability | Evaluation              | Honduras Guatemala Bolivia India Malawi                                                 | Central America South America West Africa South Asia | 3              | Uptake              | The monitoring exercise is scheduled during the dry season in all countries, as we are most interested in seeing if water systems are able to meet year rounds, needs and, thus, visit when they are under the most stress. A typical two-week exercise is typically a presentation as follows: | The structure of the groups – an external volunteer, local partner, Water For People staff, and university students (when available) is created precisely to encourage this sharing of information, technical expertise, and creative thinking. The last day of the exercise is typically a presentation | Finance: The majority of costs are borne by external participants, the World Water Corps volunteers |
| IRC ASG15            | IRC      | Strengthening the sanitation market system : WaterSHED's Hands-Off experience                                      | M.W. Jenkins, L. McLennan, G. Revell, A. Salinger                                   | 2019 | IRC WASH: All Systems Go Conference Proceedings | Peer          | X           | Market-Based approach                                  | Low                   | No                   | Primary Data Secondary Data                   | Policy Technical Private Sector Financial Gender Capacity Governance Coordination NGOs Donors Regulations                           | Approach           | Sanitation       | Rural         | Local Regional National        | Access         | Implementation          | Cambodia                                                                                | Southeast Asia                                       | 1              | Access              | 1. Start-up – design and piloting (2009-2011)<br>2. Scale-up, maturation, replication & consolidation (2012-2017).<br>3. Sustainability (2018-2020).                                                                                                                                            |                                                                                                                                                                                                                                                                                                          |                                                                                                     |
| IRC ASG2             | IRC      | Facilitating local strengthening of WASH systems - whose understanding counts?                                     | M.E. Musa, T.N. Michael, B.G. Hailegiorgis, M.J. Morris, J.A. Buttenworth, L. Henry | 2019 | IRC WASH: All Systems Go Conference Proceedings | Peer          | X           | Learning Alliances                                     | Low                   | No                   | Primary Data                                  | Coordination Monitoring Infrastructure Financial OSM Management                                                                     | Approach Framework | Water Sanitation | Rural Urban   | Local Regional                 | Sustainability | Planning Implementation | Four locations in Ethiopia: Mile, Alar Woreda South An SNPPR Woreda Woliso Debre Birhan | East Africa                                          | 4              | Uptake              | no dedicated week-long capacity-building workshops for the facilitators were held in September 2017 and April 2018, with further capacity building and support arranged subsequently                                                                                                            |                                                                                                                                                                                                                                                                                                          |                                                                                                     |
| IRC ASG20            | IRC      | Kick-starting WASH systems in newly established local authorities - an experience from Nepal                       | W. Tillett, P. Bastola, S. Gautam                                                   | 2019 | IRC WASH: All Systems Go Conference Proceedings | Grey          | X           | Systems Approach Composite Scoring                     | Medium                | No                   | Surveys Primary Data Secondary Data Workshops | Institutional Technical Capacity Environmental Financial Service Planning Implementation Social Institutional Monitoring            | Approach           | WASH             | Rural         | Regional                       | Sustainability | Case Study              | Chitwan District, Nepal                                                                 | South Asia                                           | 1              | Policy              | At the time of writing this paper, the SSI upstream component of the project in Nepal had only been running for 10 months, with a strong focus to date on assessment phase activities.                                                                                                          |                                                                                                                                                                                                                                                                                                          |                                                                                                     |
| IRC ASG22            | IRC      | Developing consumer markets within rural WASH systems                                                              | A. Smith, J. Buttenworth                                                            | 2019 | IRC WASH: All Systems Go Conference Proceedings | Peer          | X           | Market-Based approach Case Study                       | Medium                | No                   | Secondary Data                                | Private Sector Economic Government Hygiene NGOs Policy Networks                                                                     | Analysis           | Water Sanitation | Rural         | Local Regional National Sector | Sustainability | Evaluation              |                                                                                         |                                                      |                |                     |                                                                                                                                                                                                                                                                                                 |                                                                                                                                                                                                                                                                                                          |                                                                                                     |
| IRC ASG24            | IRC      | Fostering WASH system changes in Haiti using principles from the market systems sector                             | A. Montangero, V. Cavin, M. Pierre, L. Blaser                                       | 2019 | IRC WASH: All Systems Go Conference Proceedings | Peer          | X           | Market-Based approach                                  | Medium                | No                   | Focus Groups Expert Opinion                   | Private Sector Governance Users Management Planning OSM Monitoring Coordination Financial Networks Institutional Policy Regulations | Approach           | WASH             | Rural Urban   | National Regional              | Sustainability | Planning                | Haiti                                                                                   | Caribbean                                            | 1              | Policy Coordination |                                                                                                                                                                                                                                                                                                 |                                                                                                                                                                                                                                                                                                          |                                                                                                     |

|           |     |                                                                                                 |          |      |                                                          |      |   |           |     |     |              |                                                                                                          |           |            |       |      |                |                |                               |             |   |  |  |  |  |
|-----------|-----|-------------------------------------------------------------------------------------------------|----------|------|----------------------------------------------------------|------|---|-----------|-----|-----|--------------|----------------------------------------------------------------------------------------------------------|-----------|------------|-------|------|----------------|----------------|-------------------------------|-------------|---|--|--|--|--|
| IRC ASG26 | IRC | The Sanitation Cityscape<br>Conceptual Framework :<br>understanding urban<br>sanitation systems | P. Scott | 2019 | IRC WASH: All<br>Systems Go<br>Conference<br>Proceedings | Peer | X | Framework | Low | Yes | Primary Data | Institutional<br>Policy<br>Capacity<br>Financial<br>Planning<br>Monitoring<br>Services<br>Infrastructure | Framework | Sanitation | Urban | City | Sustainability | Implementation | One small town in<br>Ethiopia | East Africa | 1 |  |  |  |  |
|-----------|-----|-------------------------------------------------------------------------------------------------|----------|------|----------------------------------------------------------|------|---|-----------|-----|-----|--------------|----------------------------------------------------------------------------------------------------------|-----------|------------|-------|------|----------------|----------------|-------------------------------|-------------|---|--|--|--|--|

| Document Information |          |                                                                                                                                                                         |                                                                                |      |                                                                           |               |             | Method                                                             |                       |                      |                                                    |                                                                                                                                                                                    | Scope              |                  |               |          | Application    |                                    |                                                                                                                 |                 |                | Resources       |                              |                 |      |
|----------------------|----------|-------------------------------------------------------------------------------------------------------------------------------------------------------------------------|--------------------------------------------------------------------------------|------|---------------------------------------------------------------------------|---------------|-------------|--------------------------------------------------------------------|-----------------------|----------------------|----------------------------------------------------|------------------------------------------------------------------------------------------------------------------------------------------------------------------------------------|--------------------|------------------|---------------|----------|----------------|------------------------------------|-----------------------------------------------------------------------------------------------------------------|-----------------|----------------|-----------------|------------------------------|-----------------|------|
| Document ID          | Database | Title                                                                                                                                                                   | Author(s)                                                                      | Date | Publication                                                               | Document Type | Open Access | Method Analysis                                                    | Analytical Complexity | Interaction Analysis | Data Source Analysis                               | Factors                                                                                                                                                                            | Method Application | Aspects of WASH  | Rural / Urban | Context  | Outcome Scope  | Project Application                | Location                                                                                                        | Location Region | Location Count | Study Impacts   | Time                         | Human Resources | Cost |
| IRC ASG28            | IRC      | Keeping community managed handpump systems going                                                                                                                        | R. Carter                                                                      | 2019 | IRC WASH: All Systems Go Conference Proceedings                           | Peer          | X           | Framework                                                          | Low                   | No                   | Expert Opinion Observations                        | Community Technical Financial Context Regulations Capacity Management Institutional                                                                                                | Framework          | Water            | Rural         | Local    | Sustainability | Evaluation                         |                                                                                                                 |                 |                |                 |                              |                 |      |
| IRC ASG3             | IRC      | Strengthening water quality monitoring systems in Asutifi North, Ghana                                                                                                  | A. Karon, C. Delaine, C. Mcleod, R. Peletz, R. Khush                           | 2019 | IRC WASH: All Systems Go Conference Proceedings                           | Peer          | X           | Institutional Mapping Systems Approach Qualitative Data Analysis   | High                  | No                   | Primary Data Secondary Data interviews Surveys     | Economic Functionality Health Institutional Financial Networks Technical O&M Environmental Governance Capacity Political Monitoring                                                | Approach           | Water            | Rural         | Regional | Sustainability | Evaluation                         | Asutifi North, Ghana                                                                                            | West Africa     | 1              | Uptake          |                              |                 |      |
| IRC ASG5             | IRC      | Developing district WASH investment plans, a cornerstone of the district wide approach                                                                                  | P. Kamuyumbu, M. Kaizera                                                       | 2019 | IRC WASH: All Systems Go Conference Proceedings                           | Peer          | X           | District-Wide Approach Systems Approach                            | Medium                | No                   | Primary Data Secondary Data                        | Infrastructure Services Capacity Environmental O&M Monitoring Political                                                                                                            | Approach           | WASH             | Rural         | Regional | Sustainability | Planning                           | Rulindo District, Rwanda                                                                                        | West Africa     | 1              | Policy Services | Six years (project duration) |                 |      |
| IRC ASG7             | IRC      | Positioning WASH services within a systems framework and demonstrating achievement of open defecation free status at scale: an example from the Indian State of Bihar   | A. Alumar, B. Saviki Varma                                                     | 2019 | IRC WASH: All Systems Go Conference Proceedings                           | Grey          | X           | Systems Approach                                                   | Low                   | No                   | Workshops                                          | Access Behavioral Capacity Community Education Financial Gender Governance Technical Hygiene Implementation Institutional Monitoring Participation Political Private Sector Social | Approach           | Sanitation       | Rural         | Local    | Access         | Approach                           | Pusa block of Samastipur district, Bihar, India                                                                 | South Asia      | 1              | Services        |                              |                 |      |
| IRC ASG8             | IRC      | Performance-based financing and capacity building to strengthen WASH systems in Mozambique: early findings                                                              | L. Rudge                                                                       | 2019 | IRC WASH: All Systems Go Conference Proceedings                           | Grey          | X           | Building Blocks Qualitative Data Analysis Mapping                  | Medium                | No                   | Interviews Surveys Workshops                       | Institutional Services Infrastructure Monitoring Planning Financial Regulations Capacity Coordination                                                                              | Approach Analysis  | WASH             | Rural         | Regional | Sustainability | Planning Implementation Evaluation | 20 districts in two provinces of Mozambique (Nampula and Zambezia)                                              | East Africa     | 2              | Uptake Services |                              |                 |      |
| IRC ASG9             | IRC      | Digging deep behind the complexities of sustainable water supply in Nepal                                                                                               | A. Adhikari                                                                    | 2019 | IRC WASH: All Systems Go Conference Proceedings                           | Grey          | X           | Qualitative Data Analysis Financial Analysis                       | Medium                | No                   | Primary Data Interviews Focus Groups               | Technical Financial Governance                                                                                                                                                     | Analysis           | Water            | Rural         | Regional | Sustainability | Evaluation                         | Sarlahi and Rasuwa districts in Terai and Nuwakot, and Gorkha and Dhading districts in the Hills region (Nepal) | South Asia      | 5              |                 |                              |                 |      |
| OECD 6               | OECD     | Enhancement of domestic financial support mechanisms for water supply and sanitation in Moldova: Scenario analysis                                                      | OECD (Uncredited)                                                              | 2017 | OECD                                                                      | Grey          | X           | Scenario Analysis                                                  | Low                   | No                   | Expert opinion                                     | Social Economic Institutional Financial                                                                                                                                            | Analysis           | Water Sanitation | Rural Urban   | National | Sustainability | Planning                           | Moldova                                                                                                         | East Europe     | 1              |                 |                              |                 |      |
| SciElo 120           | SciElo   | Local and social management capacities for domestic water supply in rural communities of the Zamora Valley, Michoacán, Mexico                                           | J.L. Pimentel-Equihua, M.A. Velázquez-Machuca, J. Palerm-Viqueza               | 2012 | Agricultura, sociedad y desarrollo (Agriculture, Society and Development) | Peer          | X           | Framework                                                          | Medium                | No                   | Interviews Observation Primary Data Secondary Data | Management Governance Capacity Financial Monitoring                                                                                                                                | Analysis           | Water            | Rural         | Local    | Sustainability | Case Study                         | Six rural communities in the municipality of Zamora, in the northwest of Michoacán, Mexico                      | Central America | 6              |                 |                              |                 |      |
| SciElo 147           | SciElo   | Proposition of a system of performance indicators to evaluate the quality of sewage services                                                                            | T.L. von Sperling, N. von Sperling                                             | 2013 | Sanitary and Environmental Engineering                                    | Peer          | X           | Delphi Panel Framework                                             | High                  | No                   | Secondary Data Expert Opinions                     | Management Economic Financial Environmental Capacity Infrastructure                                                                                                                | Framework          | Sanitation       |               | National | Sustainability | Evaluation                         | Brazil                                                                                                          | South America   | 1              |                 |                              |                 |      |
| SciElo 221           | SciElo   | Water service delivery challenges in a small South African municipality: Identifying and exploring key elements and relationships in a complex social-ecological system | M.J.T. Weaver                                                                  | 2017 | Water SA                                                                  | Peer          | X           | Complex Social-Ecological Systems Approach Causal Loop Diagramming | Medium                | Yes                  | Expert Opinion Surveys                             | Infrastructure Technical Governance Users Policy NGOs Social Economic Political Financial O&M Capacity Management                                                                  | Approach           | Water            | Urban         | Regional | Sustainability | Case Study                         | Makana Local Municipality, South Africa                                                                         | South Africa    | 1              | Uptake          |                              |                 |      |
| WEDC 2               | WEDC     | Soft systems methodology for performance measurement in the Uganda water sector                                                                                         | S. Kayaga                                                                      | 2008 | IWA                                                                       | Peer          | X           | Soft Systems Methodology CATOWE                                    | Low                   | No                   | Workshops                                          | Networks Coordination Financial Services Political Economic Private Sector NGOs Donors                                                                                             | Analysis Framework | Water Sanitation |               | National | Sustainability | Evaluation                         | Uganda                                                                                                          | East Africa     | 1              | Uptake          | 3 days                       |                 |      |
| WEDC 7               | WEDC     | Livelihood factors, explaining water consumption in a (de facto) multiple uses water system in Colombia                                                                 | I. Dominguez, W. Torres-Lopez, I. Restrepo-Tanguino, R. Oviedo-Ocana, I. Smout | 2014 | Loughborough University                                                   | Peer          | X           | Statistics                                                         | High                  | No                   | Primary data Surveys                               | Agriculture Socioeconomic Technical                                                                                                                                                | Tool               | Water            | Rural         | Local    | Access         | Case Study                         | Colombia                                                                                                        | South America   | 1              |                 |                              |                 |      |

|              |            |                                                                                                                 |                                                |      |                  |      |   |                   |        |    |                                                |                                                                                        |           |       |       |                       |                |            |                                                                                                                                                                                              |                                                                                                                         |    |  |  |  |  |  |
|--------------|------------|-----------------------------------------------------------------------------------------------------------------|------------------------------------------------|------|------------------|------|---|-------------------|--------|----|------------------------------------------------|----------------------------------------------------------------------------------------|-----------|-------|-------|-----------------------|----------------|------------|----------------------------------------------------------------------------------------------------------------------------------------------------------------------------------------------|-------------------------------------------------------------------------------------------------------------------------|----|--|--|--|--|--|
| World Bank 1 | World Bank | Sustainability<br>Assessment of Rural<br>Water Service Delivery<br>Models Findings of a<br>Multi-Country Review | S. Sheth, H. Lockwood, S.<br>Mansour, S. Smith | 2017 | World Bank Group | Grey | X | Composite Scoring | Medium | No | Interviews<br>Secondary Data<br>Expert Opinion | Institutional<br>Financial<br>Management<br>Environmental<br>Monitoring<br>Regulations | Framework | Water | Rural | Regional-<br>National | Sustainability | Case Study | Bangladesh<br>Benin<br>Brazil<br>China<br>Ethiopia<br>Ghana<br>Haiti<br>India<br>Indonesia<br>the Kyrgyz Republic<br>Morocco<br>Nepal<br>Nicaragua<br>the Philippines<br>Tanzania<br>Vietnam | South Asia<br>Central America<br>Caribbean<br>East Africa<br>West Africa<br>Central Asia<br>East Asia<br>Southeast Asia | 16 |  |  |  |  |  |
|--------------|------------|-----------------------------------------------------------------------------------------------------------------|------------------------------------------------|------|------------------|------|---|-------------------|--------|----|------------------------------------------------|----------------------------------------------------------------------------------------|-----------|-------|-------|-----------------------|----------------|------------|----------------------------------------------------------------------------------------------------------------------------------------------------------------------------------------------|-------------------------------------------------------------------------------------------------------------------------|----|--|--|--|--|--|

| Document Information |            |                                           |                       |      |                |               |             | Method                                   |                       |                      |                                                   |                                                                                                                                                                                   | Scope                     |                 |                    |                   |                              | Application                                      |                                                                                                                                                                                                                   |                                                                                                                |                |               | Resources |                 |      |
|----------------------|------------|-------------------------------------------|-----------------------|------|----------------|---------------|-------------|------------------------------------------|-----------------------|----------------------|---------------------------------------------------|-----------------------------------------------------------------------------------------------------------------------------------------------------------------------------------|---------------------------|-----------------|--------------------|-------------------|------------------------------|--------------------------------------------------|-------------------------------------------------------------------------------------------------------------------------------------------------------------------------------------------------------------------|----------------------------------------------------------------------------------------------------------------|----------------|---------------|-----------|-----------------|------|
| Document ID          | Database   | Title                                     | Author(s)             | Date | Publication    | Document Type | Open Access | Method Analysis                          | Analytical Complexity | Interaction Analysis | Data Source Analysis                              | Factors                                                                                                                                                                           | Method Application        | Aspects of WASH | Rural / Urban      | Context           | Outcome Scope                | Project Application                              | Location                                                                                                                                                                                                          | Location Region                                                                                                | Location Count | Study Impacts | Time      | Human Resources | Cost |
| World Bank<br>218    | World Bank | Introducing FOAM                          | Y. Coombes, J. Devine | 2010 | The World Bank | Grey          | X           | Framework                                | Medium                | No                   | Secondary Data                                    | Technical<br>Financial<br>Behavioral<br>Regulations<br>Social                                                                                                                     | Approach<br><br>Framework | Hygiene         | Rural<br><br>Urban | Local<br><br>City | Sustainability               | Planning<br><br>Implementation                   | China (Sichuan)<br>China (Shaanxi)<br><br>Ghana<br><br>India (Kerala)<br><br>Kyrgyzstan<br><br>Madagascar<br><br>Peru<br><br>Senegal<br><br>Tanzania<br><br>Uganda<br>Vietnam                                     | East Asia<br><br>West Africa<br><br>South America<br><br>Central Asia<br><br>East Africa<br><br>Southeast Asia | 3              |               |           |                 |      |
| World Bank<br>355    | World Bank | Community Slum<br><br>Sanitation in India | World Bank Group      | 2016 | The World Bank | Grey          | X           | Enabling<br>Environment<br><br>Framework | Low                   | No                   | Surveys<br><br>Primary Data<br><br>Secondary Data | Political<br>Institutional<br>Infrastructure<br>Community<br>Financial<br>Regulations<br>Health<br>Participation<br>Gender<br>Coordination<br>Context<br>Management<br>Monitoring | Approach                  | Sanitation      | Urban              | City<br><br>Local | Access<br><br>Sustainability | Planning<br><br>Implementation<br><br>Evaluation | Six cities in India:<br><br>Ahmedabad, Gujarat;<br><br>Bhopal Madhya,<br>Pradesh; Kalyani,<br>West Bengal;<br><br>Mumbai, Maharashtra;<br><br>Pune, Maharashtra;<br><br>Trichirappalli (or<br>Trichy), Tamil Nadu | South Asia                                                                                                     | 6              |               |           |                 |      |

[illegible]

|       |     |                          |                          |      |     |      |   |           |        |    |                |          |          |            |       |      |        |          |  |  |  |  |  |                |
|-------|-----|--------------------------|--------------------------|------|-----|------|---|-----------|--------|----|----------------|----------|----------|------------|-------|------|--------|----------|--|--|--|--|--|----------------|
| WSP 1 | WSP | Marching together with a | N.T. Utomo, M. Listiyani | 2010 | WSP | Grey | X | Framework | Medium | No | Workshops      | NGOs     | Approach | Sanitation | Urban | City | Access | Planning |  |  |  |  |  |                |
|       |     | Citywide Sanitation      |                          |      |     |      |   |           |        |    | Surveys        | Policy   |          |            |       |      |        |          |  |  |  |  |  |                |
|       |     | Strategy                 |                          |      |     |      |   |           |        |    | Secondary Data | Capacity |          |            |       |      |        |          |  |  |  |  |  | Sustainability |
|       |     |                          |                          |      |     |      |   |           |        |    | Regulations    |          |          |            |       |      |        |          |  |  |  |  |  |                |
|       |     |                          |                          |      |     |      |   |           |        |    | Financial      |          |          |            |       |      |        |          |  |  |  |  |  |                |
|       |     |                          |                          |      |     |      |   |           |        |    | Mobilization   |          |          |            |       |      |        |          |  |  |  |  |  |                |



## SI 4: RESULTS SUMMARY

Table S4-1: Results Summary Table - Methodology

| Methodology Descriptors | Criteria                                  |      |      |     |       |     |
|-------------------------|-------------------------------------------|------|------|-----|-------|-----|
|                         | Method                                    | Peer | Grey | Org | Total | %   |
| Method <sup>2</sup>     | Framework                                 | 21   | 12   | 8   | 41    | 31% |
|                         | Composite Scoring                         | 12   | 10   | 8   | 30    | 23% |
|                         | Qualitative Data Analysis                 | 11   | 10   | 2   | 23    | 17% |
|                         | Statistics                                | 11   | 1    | 2   | 14    | 11% |
|                         | Social Network Analysis                   | 8    | 2    |     | 10    | 8%  |
|                         | Case Study                                | 5    | 1    | 1   | 7     | 5%  |
|                         | Systems Approach                          | 3    | 2    | 2   | 7     | 5%  |
|                         | AHP                                       | 6    |      |     | 6     | 5%  |
|                         | Multi-Criteria Decision Analysis          | 5    | 1    |     | 6     | 5%  |
|                         | System Dynamics                           | 6    |      |     | 6     | 5%  |
|                         | Market-Based Approach                     | 5    |      |     | 5     | 4%  |
|                         | Causal Loop Diagramming                   | 4    | 2    |     | 6     | 5%  |
|                         | Collective Action / Impact                | 1    |      | 3   | 4     | 3%  |
|                         | Method for Participatory Assessment       | 2    | 1    | 1   | 4     | 3%  |
|                         | Theory of Change                          |      | 1    | 3   | 4     | 3%  |
|                         | Building Blocks                           |      | 2    | 1   | 3     | 2%  |
|                         | Learning Alliances                        | 1    |      | 2   | 3     | 2%  |
|                         | Participatory Systems Mapping             | 2    | 1    |     | 3     | 2%  |
|                         | Service Delivery Approach                 |      |      | 3   | 3     | 2%  |
|                         | SIASAR                                    |      | 3    |     | 3     | 2%  |
|                         | Agent Based Modeling                      | 2    |      |     | 2     | 2%  |
|                         | Bayesian Networks                         | 2    |      |     | 2     | 2%  |
|                         | Financial Analysis                        |      | 1    | 1   | 2     | 2%  |
|                         | Lifecycle Analysis                        | 2    |      |     | 2     | 2%  |
|                         | Qualitative Comparative Analysis          | 2    |      |     | 2     | 2%  |
|                         | Behavioral Model                          | 1    |      |     | 1     | 1%  |
|                         | CATOWE                                    | 1    |      |     | 1     | 1%  |
|                         | Cost-Benefit Analysis                     | 1    |      |     | 1     | 1%  |
|                         | Decision Trees                            | 1    |      |     | 1     | 1%  |
|                         | Delphi Panel                              | 1    |      |     | 1     | 1%  |
|                         | District-Wide Approach / Systems Approach | 1    |      |     | 1     | 1%  |
|                         | Enabling Environment                      |      | 1    |     | 1     | 1%  |
|                         | GIS                                       | 1    |      |     | 1     | 1%  |
|                         | Graphic Modeling                          | 1    |      |     | 1     | 1%  |
|                         | Institutional Mapping                     | 1    |      |     | 1     | 1%  |

|                                    |                                   |             |      |      |       |       |   |
|------------------------------------|-----------------------------------|-------------|------|------|-------|-------|---|
|                                    | Mathematical optimization         | 1           |      |      | 1     | 1%    |   |
|                                    | Remote sensing                    | 1           |      |      | 1     | 1%    |   |
|                                    | Scenario Analysis                 |             | 1    |      | 1     | 1%    |   |
|                                    | Shit Flow Diagrams                |             |      | 1    | 1     | 1%    |   |
|                                    | Soft Systems Methodology          | 1           |      |      | 1     | 1%    |   |
|                                    | Sustainable Livelihoods Framework |             | 1    |      | 1     | 1%    |   |
|                                    |                                   |             |      |      |       |       |   |
| Analytical Complexity <sup>1</sup> |                                   | Peer        | Grey | Org  | Total | %     |   |
|                                    | Low                               | 13          | 10   | 10   | 33    | 25%   |   |
|                                    | Medium                            | 23          | 16   | 10   | 49    | 37%   |   |
|                                    | High                              | 39          | 9    | 3    | 51    | 38%   |   |
| Interactions <sup>1</sup>          |                                   | Peer        | Grey | Org  | Total | %     |   |
|                                    |                                   | 26          | 5    | 4    | 35    | 26%   |   |
| Sources of data <sup>2</sup>       |                                   | Data Source | Peer | Grey | Org   | Total | % |
|                                    | Secondary Data                    | 34          | 18   | 19   | 71    | 53%   |   |
|                                    | Interviews                        | 37          | 15   | 11   | 63    | 47%   |   |
|                                    | Primary Data                      | 20          | 7    | 10   | 37    | 28%   |   |
|                                    | Observation                       | 22          | 10   | 3    | 35    | 26%   |   |
|                                    | Surveys                           | 16          | 11   | 5    | 32    | 24%   |   |
|                                    | Focus Groups                      | 14          | 10   | 7    | 31    | 23%   |   |
|                                    | Expert Opinion                    | 13          | 10   | 5    | 28    | 21%   |   |
|                                    | Workshops                         | 1           | 5    | 0    | 6     | 5%    |   |
| Factors <sup>2</sup>               |                                   | Factor Name | Peer | Grey | Org   | Total | % |
|                                    | Financial                         | 46          | 31   | 21   | 98    | 74%   |   |
|                                    | Technical                         | 45          | 17   | 9    | 71    | 53%   |   |
|                                    | Institutional                     | 21          | 19   | 17   | 57    | 43%   |   |
|                                    | Social                            | 30          | 15   | 9    | 54    | 41%   |   |
|                                    | Environmental                     | 32          | 8    | 13   | 53    | 40%   |   |
|                                    | Capacity                          | 17          | 18   | 9    | 44    | 33%   |   |
|                                    | Economic                          | 30          | 6    | 4    | 40    | 30%   |   |
|                                    | O&M                               | 20          | 13   | 7    | 40    | 30%   |   |
|                                    | Management                        | 18          | 14   | 7    | 39    | 29%   |   |
|                                    | Governance                        | 20          | 9    | 7    | 36    | 27%   |   |
|                                    | Community                         | 21          | 10   | 3    | 34    | 26%   |   |

|                |      |      |     |           |            |
|----------------|------|------|-----|-----------|------------|
| Monitoring     | 7    | 16   | 11  | <b>34</b> | <b>26%</b> |
| Coordination   | 13   | 11   | 6   | <b>30</b> | <b>23%</b> |
| Services       | 10   | 15   | 3   | <b>28</b> | <b>21%</b> |
| Policy         | 10   | 7    | 10  | <b>27</b> | <b>20%</b> |
| Regulations    | 6    | 15   | 4   | <b>25</b> | <b>19%</b> |
| NGOs           | 11   | 10   | 1   | <b>22</b> | <b>17%</b> |
| Access         | 10   | 8    | 2   | <b>20</b> | <b>15%</b> |
| Infrastructure | 9    | 6    | 5   | <b>20</b> | <b>15%</b> |
| Private Sector | 8    | 9    | 3   | <b>20</b> | <b>15%</b> |
| Hygiene        | 7    | 9    | 3   | <b>19</b> | <b>14%</b> |
| Political      | 6    | 7    | 5   | <b>18</b> | <b>14%</b> |
| Functionality  | 12   | 3    | 2   | <b>17</b> | <b>13%</b> |
| Health         | 9    | 6    | 2   | <b>17</b> | <b>13%</b> |
| Networks       | 11   | 4    | 2   | <b>17</b> | <b>13%</b> |
| User           | 14   | 2    | 1   | <b>17</b> | <b>13%</b> |
| Planning       | 4    | 5    | 7   | <b>16</b> | <b>12%</b> |
| Context        | 9    | 4    | 2   | <b>15</b> | <b>11%</b> |
| Implementation | 3    | 7    | 4   | <b>14</b> | <b>11%</b> |
| Behavioral     | 7    | 6    | 0   | <b>13</b> | <b>10%</b> |
| Education      | 6    | 5    | 2   | <b>13</b> | <b>10%</b> |
| Participation  | 3    | 5    | 5   | <b>13</b> | <b>10%</b> |
| Cultural       | 7    | 3    | 1   | <b>11</b> | <b>8%</b>  |
| Demographic    | 4    | 3    | 1   | <b>8</b>  | <b>6%</b>  |
| Gender         | 2    | 5    | 1   | <b>8</b>  | <b>6%</b>  |
| Donors         | 3    | 2    | 2   | <b>7</b>  | <b>5%</b>  |
| Socioeconomic  | 7    | 0    | 0   | <b>7</b>  | <b>5%</b>  |
| Climate        | 4    | 1    | 1   | <b>6</b>  | <b>5%</b>  |
| Agriculture    | 3    | 1    | 1   | <b>5</b>  | <b>4%</b>  |
| Energy         | 5    | 0    | 0   | <b>5</b>  | <b>4%</b>  |
| <hr/>          |      |      |     |           |            |
| Factor Count   | Peer | Grey | Org | Total     | %          |
| 2              | 1    | 0    | 0   | <b>1</b>  | <b>1%</b>  |
| 3              | 5    | 1    | 1   | <b>7</b>  | <b>5%</b>  |
| 4              | 4    | 2    | 0   | <b>6</b>  | <b>5%</b>  |
| 5              | 14   | 4    | 5   | <b>23</b> | <b>17%</b> |
| 6              | 16   | 3    | 1   | <b>20</b> | <b>15%</b> |
| 7              | 9    | 2    | 4   | <b>15</b> | <b>11%</b> |
| 8              | 11   | 3    | 4   | <b>18</b> | <b>14%</b> |
| 9              | 5    | 3    | 0   | <b>8</b>  | <b>6%</b>  |
| 10             | 3    | 5    | 2   | <b>10</b> | <b>8%</b>  |

Unless specified otherwise, each table represents counts of studies and % of total count of studies, n=133

Notes: 1: a-priori, deductive criteria; 2: open or emergent criteria

Note: Many descriptors represent non-exclusive criteria (i.e. studies can be classified under multiple attributes, % do not always sum to 100%)

Table SI 4-2: Results Summary Table - Scope

| Scope Descriptors                  | Criteria                   |      |      |     |       |     |
|------------------------------------|----------------------------|------|------|-----|-------|-----|
| <b>Aspects of WASH<sup>1</sup></b> | Scope                      | Peer | Grey | Org | Total | %   |
|                                    | Water (only)               | 37   | 10   | 8   | 55    | 41% |
|                                    | Sanitation (only)          | 15   | 10   | 4   | 29    | 22% |
|                                    | Water and Sanitation       | 12   | 6    | 2   | 20    | 15% |
|                                    | WASH                       | 5    | 4    | 7   | 16    | 12% |
|                                    | Water, Sanitation, Hygiene | 3    | 2    | 1   | 6     | 5%  |
|                                    | Hygiene                    | 1    | 1    | 0   | 2     | 2%  |
|                                    | Hygiene and Sanitation     | 2    | 2    | 0   | 4     | 3%  |
| <b>Outcome Scope<sup>2</sup></b>   | Outcome                    | Peer | Grey | Org | Total | %   |
|                                    | Sustainability             | 48   | 23   | 17  | 88    | 66% |
|                                    | Access                     | 13   | 3    | 0   | 16    | 12% |
|                                    | Health                     | 4    | 0    | 0   | 4     | 3%  |
|                                    | Behavior Change            | 1    | 2    | 0   | 3     | 2%  |
|                                    | Coordination               | 2    | 1    | 0   | 3     | 2%  |
|                                    | Functionality              | 1    | 0    | 0   | 1     | 1%  |
|                                    | Policy                     | 0    | 0    | 1   | 1     | 1%  |
| <b>Context<sup>1</sup></b>         | Context                    | Peer | Grey | Org | Total | %   |
|                                    | Urban and Rural            | 9    | 10   | 11  | 30    | 23% |
|                                    | Urban (Only)               | 18   | 7    | 2   | 27    | 21% |
|                                    | Urban (Any)                | 27   | 16   | 13  | 56    | 43% |
|                                    | Rural (Only)               | 44   | 15   | 8   | 67    | 52% |
|                                    | Rural (Any)                | 53   | 24   | 19  | 96    | 74% |
|                                    | None                       | 4    | 1    | 2   | 7     | 5%  |
|                                    | Application                | Peer | Grey | Org | Total | %   |
|                                    | Local                      | 46   | 19   | 14  | 79    | 59% |
|                                    | Regional                   | 21   | 10   | 11  | 42    | 32% |
|                                    | National                   | 8    | 8    | 11  | 27    | 20% |
|                                    | City                       | 10   | 9    | 1   | 20    | 15% |
|                                    | City-only                  | 9    | 5    | 1   | 15    | 11% |
|                                    | Sector                     | 2    | 2    | 7   | 11    | 8%  |
|                                    | None / Unspecified         | 1    | 0    | 0   | 1     | 1%  |

Unless specified otherwise, each table represents counts of studies and % of total count of studies, n=133

Notes: 1: a-priori, deductive criteria; 2: open or emergent criteria

Note: Many descriptors represent non-exclusive criteria (i.e. studies can be classified under multiple attributes, % do not always sum to 100%)

Table SI 4-3: Results Summary Table - Application

| Application Descriptors          | Criteria            |      |      |     |       |     |
|----------------------------------|---------------------|------|------|-----|-------|-----|
| Project Application <sup>1</sup> | Project Application | Peer | Grey | Org | Total | %   |
|                                  | Evaluation          | 26   | 15   | 15  | 56    | 42% |
|                                  | Case Study          | 38   | 9    | 4   | 51    | 38% |
|                                  | Planning            | 16   | 13   | 11  | 40    | 30% |
|                                  | Implementation      | 4    | 7    | 4   | 15    | 11% |
|                                  | None                | 0    | 0    | 1   | 1     | 1%  |
| Location <sup>1</sup>            | Region              | Peer | Grey | Org | Total | %   |
|                                  | East Africa         | 23   | 10   | 13  | 46    | 40% |
|                                  | South Asia          | 21   | 10   | 6   | 37    | 32% |
|                                  | West Africa         | 12   | 5    | 11  | 28    | 24% |
|                                  | South America       | 9    | 6    | 4   | 19    | 17% |
|                                  | East Asia           | 8    | 6    | 2   | 16    | 14% |
|                                  | Southeast Asia      | 8    | 6    | 2   | 16    | 14% |
|                                  | Central America     | 8    | 6    | 2   | 16    | 14% |
|                                  | South Africa        | 4    |      | 2   | 6     | 5%  |
|                                  | Caribbean           | 2    | 2    | 1   | 5     | 4%  |
|                                  | Oceania             | 1    | 3    |     | 4     | 3%  |
|                                  | Central Asia        | 1    | 3    |     | 4     | 3%  |
|                                  | North America       | 1    |      |     | 1     | 1%  |
|                                  | East Europe         |      | 1    |     | 1     | 1%  |
|                                  | Middle Africa       | 1    |      |     | 1     | 1%  |
|                                  | Country             | Peer | Grey | Org | Total | %   |
|                                  | India               | 8    | 8    | 4   | 20    | 15% |
|                                  | Ghana               | 5    | 3    | 10  | 18    | 14% |
|                                  | Uganda              | 7    | 4    | 6   | 17    | 13% |
|                                  | Tanzania            | 5    | 6    | 2   | 13    | 10% |
|                                  | Nepal               | 7    | 3    | 1   | 11    | 8%  |
|                                  | Kenya               | 7    | 1    | 2   | 10    | 8%  |
|                                  | Nicaragua           | 3    | 4    | 2   | 9     | 7%  |
|                                  | Bangladesh          | 6    | 1    | 1   | 8     | 6%  |
|                                  | Burkina Faso        | 3    |      | 5   | 8     | 6%  |
|                                  | Ethiopia            | 4    | 2    | 2   | 8     | 6%  |
|                                  | Indonesia           | 3    | 4    | 1   | 8     | 6%  |
|                                  | Bolivia             | 4    | 2    | 1   | 7     | 5%  |
|                                  | Peru                | 1    | 4    | 2   | 7     | 5%  |
|                                  | Honduras            | 1    | 3    | 2   | 6     | 5%  |
|                                  | Malawi              | 2    | 1    | 3   | 6     | 5%  |
|                                  | Mexico              | 3    | 3    |     | 6     | 5%  |

|                                         |                      |             |             |            |              |          |
|-----------------------------------------|----------------------|-------------|-------------|------------|--------------|----------|
|                                         | Philippines          | 2           | 3           | 1          | 6            | 5%       |
|                                         | South Africa         | 4           |             | 2          | 6            | 5%       |
|                                         | Vietnam              | 1           | 5           |            | 6            | 5%       |
|                                         | Brazil               | 2           | 2           | 1          | 5            | 4%       |
|                                         | Colombia             | 3           | 1           |            | 4            | 3%       |
|                                         | Dominican Republic   | 1           | 2           | 1          | 4            | 3%       |
|                                         | Mozambique           |             | 1           | 3          | 4            | 3%       |
|                                         | Rwanda               | 2           |             | 2          | 4            | 3%       |
|                                         | Senegal              |             | 2           | 2          | 4            | 3%       |
|                                         | Costa Rica           | 1           | 2           |            | 3            | 2%       |
|                                         | Lao                  | 2           | 1           |            | 3            | 2%       |
|                                         | Niger                | 1           | 1           | 1          | 3            | 2%       |
|                                         | Panama               |             | 3           |            | 3            | 2%       |
|                                         | Timor-Leste          | 2           | 1           |            | 3            | 2%       |
|                                         | Benin                |             | 1           | 1          | 2            | 2%       |
|                                         | Cambodia             | 2           |             |            | 2            | 2%       |
|                                         | China                |             | 2           |            | 2            | 2%       |
|                                         | Columbia             | 1           |             | 1          | 2            | 2%       |
|                                         | Fiji                 | 2           |             |            | 2            | 2%       |
|                                         | Guatemala            | 1           |             | 1          | 2            | 2%       |
|                                         | Haiti                | 1           | 1           |            | 2            | 2%       |
|                                         | Madagascar           |             | 1           | 1          | 2            | 2%       |
|                                         | Nigeria              | 1           | 1           |            | 2            | 2%       |
|                                         | Pakistan             | 2           |             |            | 2            | 2%       |
|                                         | Zimbabwe             | 2           |             |            | 2            | 2%       |
|                                         | Argentina            | 1           |             |            | 1            | 1%       |
|                                         | Canada               | 1           |             |            | 1            | 1%       |
|                                         | Egypt                |             |             | 1          | 1            | 1%       |
|                                         | Jordan               |             |             | 1          | 1            | 1%       |
|                                         | Kyrgyz Republic      |             | 1           |            | 1            | 1%       |
|                                         | Kyrgyzstan           |             | 1           |            | 1            | 1%       |
|                                         | Laos                 | 1           |             |            | 1            | 1%       |
|                                         | Liberia              |             |             | 1          | 1            | 1%       |
|                                         | Mali                 | 1           |             |            | 1            | 1%       |
|                                         | Moldova              |             | 1           |            | 1            | 1%       |
|                                         | Morocco              |             | 1           |            | 1            | 1%       |
|                                         | Palestine            |             |             | 1          | 1            | 1%       |
|                                         | Papua New Guinea     |             | 1           |            | 1            | 1%       |
|                                         | Paraguay             |             | 1           |            | 1            | 1%       |
|                                         | Sudan                |             |             | 1          | 1            | 1%       |
|                                         | Sweden               |             | 1           |            | 1            | 1%       |
|                                         | Tajikistan           |             |             |            | 1            | 1%       |
|                                         | Thailand             | 1           |             |            | 1            | 1%       |
|                                         | Zambia               |             |             | 1          | 1            | 1%       |
| <b>Reporting of Impacts<sup>2</sup></b> | <b>Study Impacts</b> | <b>Peer</b> | <b>Grey</b> | <b>Org</b> | <b>Total</b> | <b>%</b> |
|                                         | Uptake               | 7           | 5           | 4          | 16           | 12%      |
|                                         | Services             | 4           | 3           | 2          | 9            | 7%       |
|                                         | Policy               | 2           | 2           | 4          | 8            | 6%       |

|  |                 |   |   |   |   |    |
|--|-----------------|---|---|---|---|----|
|  | Coordination    | 2 |   | 3 | 5 | 4% |
|  | Behavior Change | 2 | 2 |   | 4 | 3% |
|  | Financial       |   | 1 | 1 | 2 | 2% |
|  | Users           | 1 |   | 1 | 2 | 2% |
|  | Health          | 1 |   |   | 1 | 1% |
|  | Access          | 1 |   |   | 1 | 1% |

Unless specified otherwise, each table represents counts of studies and % of total count of studies, n=133

Notes: 1: a-priori, deductive criteria; 2: open or emergent criteria

Note: Many descriptors represent non-exclusive criteria (i.e. studies can be classified under multiple attributes, % do not always sum to 100%)

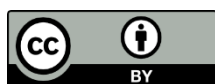

© 2019 by the authors. Submitted for possible open access publication under the terms and conditions of the Creative Commons Attribution (CC BY) license (<http://creativecommons.org/licenses/by/4.0/>).
